# Supplementary material for: Developing Cyclic Peptomers as Broad-Spectrum Type III Secretion System Inhibitors in Gram-Negative Bacteria
Source: PubMed Central journal article supplement (PMC8373237; doi:10.1128/aac.01690-20), 2021-06-17
Supplement: aac.01690-20-s0001.pdf [file aac.01690-20-s0001.pdf]

**Table S1: Solubility of cyclic peptomers**

| Compounds  | Solubility ( $\mu\text{M}$ ) |                 |                 | IC <sub>50</sub> |
|------------|------------------------------|-----------------|-----------------|------------------|
|            | PBS                          | DMEM            | M9              |                  |
| 1EpDN 3Ala | 180                          | ND <sup>a</sup> | ND <sup>a</sup> | >1000*           |
| 1EpDN 4Ala | 75                           | ND <sup>a</sup> | ND <sup>a</sup> | >1000*           |
| 1EpDN 5Ala | 127                          | ND <sup>a</sup> | ND <sup>a</sup> | >1000*           |
| 1EpDN 6Ala | 125                          | ND <sup>a</sup> | ND <sup>a</sup> | >1000*           |
| 1EpDN      | 14-17                        | ND <sup>a</sup> | ND <sup>a</sup> | 8.2              |
| 2EpDN      | 12                           | ND <sup>a</sup> | ND <sup>a</sup> | 15.3             |
| 3EpDN      | 18                           | ND <sup>a</sup> | ND <sup>a</sup> | 16               |
| 4EpDN      | 13                           | 12              | 10              | 3.9              |
| 5EpDN      | 13                           | ND <sup>a</sup> | ND <sup>a</sup> | 6.3              |
| 6EpDN      | 1                            | ND <sup>a</sup> | ND <sup>a</sup> | >1000*           |
| 7EpDN      | 26                           | ND <sup>a</sup> | ND <sup>a</sup> | 6.7              |
| 8EpDN      | 1                            | ND <sup>a</sup> | ND <sup>a</sup> | 41.5             |
| 9EpDN      | 10                           | ND <sup>a</sup> | ND <sup>a</sup> | 12.8             |
| 4EpDN 1Sar | ND <sup>a</sup>              | 6               | 4               | 19               |
| 4EpDN 2Sar | ND <sup>a</sup>              | 61              | 61              | ~139.5           |

\* >1000 indicates IC<sub>50</sub> could not be calculated

<sup>a</sup>: Not Determined (ND)

**Table S2. Primers used in this study**

| <b>Name</b> | <b>Sequence</b>         | <b>Description</b>                         |
|-------------|-------------------------|--------------------------------------------|
| oHL364      | TACTGGAAACGGTGGCTAATAC  | 16S Forward for <i>Salmonella</i> qPCR     |
| oHL365      | TACCTCACCAACAAGCTAATCC  | 16S Reverse for <i>Salmonella</i> qPCR     |
| oHL362      | GCCAACGACGGTGAAACTA     | fliC Forward for <i>Salmonella</i> qPCR    |
| oHL363      | GCCGTATCGCTGACCTTATATT  | fliC Reverse for <i>Salmonella</i> qPCR    |
| oHL346      | ACGACTCATAATTGGCGATAC   | hilA Forward for <i>Salmonella</i> qPCR    |
| oHL347      | CTGCGATAATCCCTTCACGATAG | hilA Reverse for <i>Salmonella</i> qPCR    |
| oHL348      | GGCGCTCTCTATGCACTTATC   | hilD Forward for <i>Salmonella</i> qPCR    |
| oHL349      | GCAGGAAAGTCAGGCGTATAG   | hilD Reverse for <i>Salmonella</i> qPCR    |
| oHL350      | GCAGCAAATTATTACGCCTTCTC | invF Forward for <i>Salmonella</i> qPCR    |
| oHL351      | CTGGTTGACTGAGCGAGTAAAT  | invF Reverse for <i>Salmonella</i> qPCR    |
| oHL352      | ATGCGTTGTCCGGTAGTATTT   | sipC Forward for <i>Salmonella</i> qPCR    |
| oHL353      | TTAAGCGCGCCTCTTTCA      | sipC Reverse for <i>Salmonella</i> qPCR    |
| oHL354      | TCTTGTTATGCAGGAGGTGATG  | sipA Forward for <i>Salmonella</i> qPCR    |
| oHL355      | GTCAACAAGGTGCGTAAGATTG  | sipA Reverse for <i>Salmonella</i> qPCR    |
| BQ89        | CATGACCATCGCCTGATCTT    | dnaB Forward for <i>P. aeruginosa</i> qPCR |
| BQ90        | GTTGTCCTTCCTTCTCCAAC    | dnaB Reverse for <i>P. aeruginosa</i> qPCR |

|        |                                                 |                                                            |
|--------|-------------------------------------------------|------------------------------------------------------------|
| oHL258 | ATGCGGTAATGGACAAGGTC                            | exoT Forward for <i>P. aeruginosa</i> qPCR                 |
| oHL259 | ACTCGCCGTTGGTATAGAGA                            | exoT Reverse for <i>P. aeruginosa</i> qPCR                 |
| oHL282 | CCGGCAGATGTCCATTTC                              | DsbA Forward for <i>P. aeruginosa</i> qPCR                 |
| oHL283 | CTCGACACCCATGCTTTC                              | DsbA Reverse for <i>P. aeruginosa</i> qPCR                 |
| BQ91   | CTCTACACCGGCATTCACTAC                           | exoS Forward for <i>P. aeruginosa</i> qPCR                 |
| BQ92   | CATACCTTGGTCGATCAGCTT                           | exoS Reverse for <i>P. aeruginosa</i> qPCR                 |
| oHL210 | agcgaattcgagctcggtagcATGTCACTCAGTC<br>GTCGC     | Forward primer for 33 amino acid of <i>sufI</i> N terminus |
| oHL217 | tttctgggtgAGGTTGCTGAGTACTACTAG                  | Reverse primer for 33 amino acid of <i>sufI</i> N terminus |
| oHL218 | tcagcaacctCACCCAGAAACGCTGGTG                    | Forward primer for $\beta$ -lactamase gene                 |
| oHL219 | tctagaggatccccggtagcTTACCAATGCTTA<br>ATCAGTGAGG | Reverse primer for $\beta$ -lactamase gene                 |

**A****1EpDN 1Sar**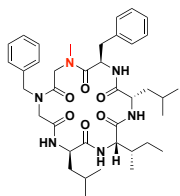**1EpDN 2Sar**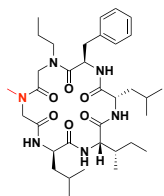**1EpDN 3Ala**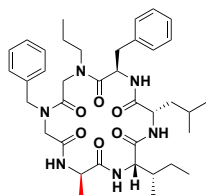**1EpDN 4Ala**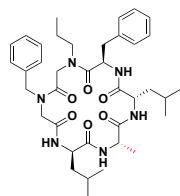**1EpDN 5Ala**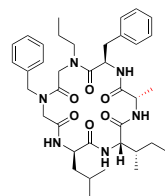**1EpDN 6Ala**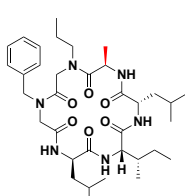**B****1EpDN 1Sar**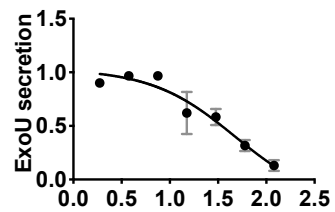**1EpDN 2Sar**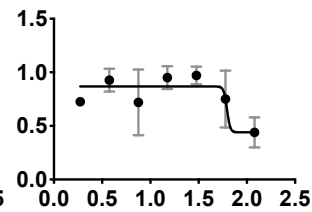**1EpDN 3Ala**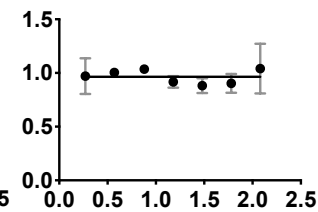**1EpDN 4Ala**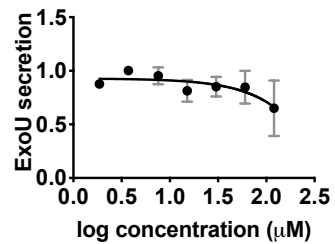**1EpDN 5Ala**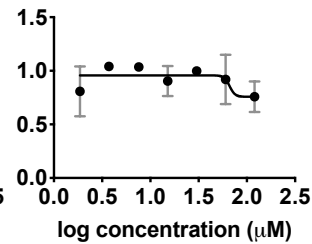**1EpDN 6Ala**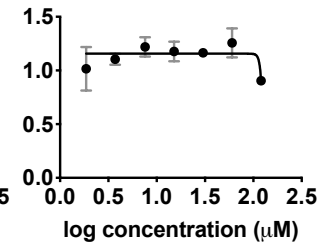

**Figure S1: 1EpDN alanine/Sarcosine scan suggests peptoid sidechains are important for biological activity.** (A) Structures of 1EpDN alanine derivatives. D-form of side chain is shown in red. (B) WT *P. aeruginosa* PA103 was grown under T3SS-inducing conditions with increasing concentrations of cyclic peptomers. Secretion of T3SS cargo into the culture supernatant was assessed by precipitating secreted proteins and visualizing them with Coomassie blue. ExoU band intensities were quantified and normalized to that of the DMSO control. The results are from at least two independent experiments. Error bars are standard errors of the mean. Nonlinear curve fitting is shown to depict the trend of inhibition.

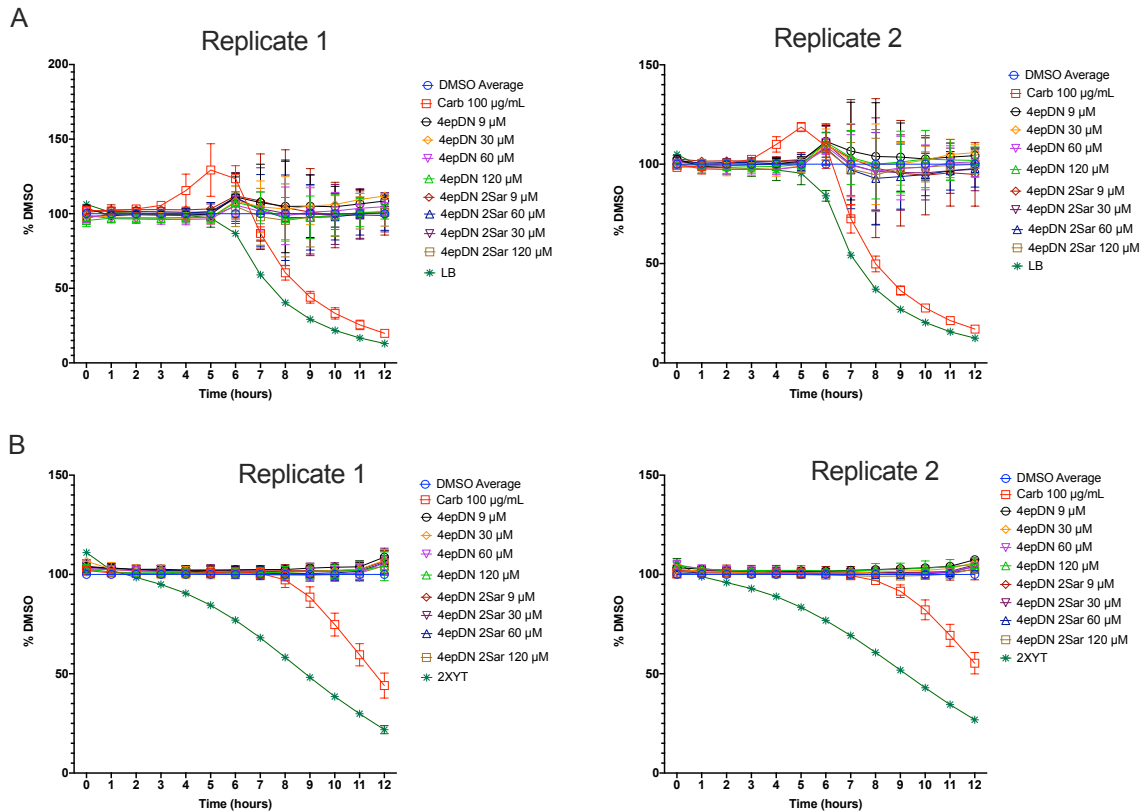

**Figure S2: Cyclic peptomers do not affect bacterial viability.** *P. aeruginosa* PA01 (A) or *Y. pseudotuberculosis* (B) was grown in LB or 2xYT medium at 37°C or 26°C in the presence of cyclic peptomers at 9 µM, 30 µM, 60 µM and 120 µM, equivalent volume of DMSO or Carbenicillin (100 µg/mL). Resazurin-based alamarBlue HS cell viability reagent was used to monitor metabolic activity of the bacteria over a period of 12 hrs. Fluorescence of treatment over control was plotted over time. Media only served as a control for bacterial growth. The experiment was carried out in two biological replicates with three technical replicate each.

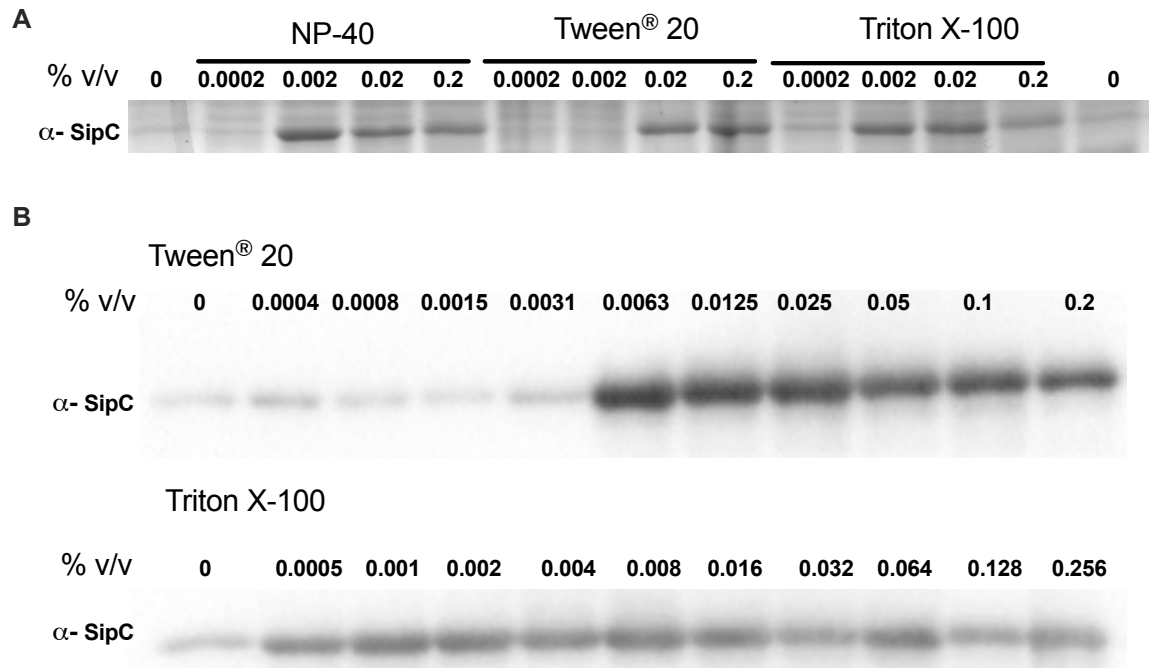

**Figure S3: Secretion of *Salmonella* T3SS substrate in the presence of non-ionic detergents.** Detergents without T3SS inhibitors were used to determine the highest concentration of detergent that can be added to the cultures without causing an observable effect on the T3SS. **(A)** *Salmonella enterica* Typhimurium was grown in LB with increasing concentrations of NP-40, Tween<sup>®</sup> 20, or Triton X-100. Secretion of SPI-1 T3SS effector SipC into the culture supernatant was assessed by precipitating secreted proteins and visualizing them with Coomassie blue. **(B)** Secretion of SipC in the presence of increasing concentrations of Tween<sup>®</sup> 20 or Triton X-100 was detected by Western Blot.

### WT *Samonella*

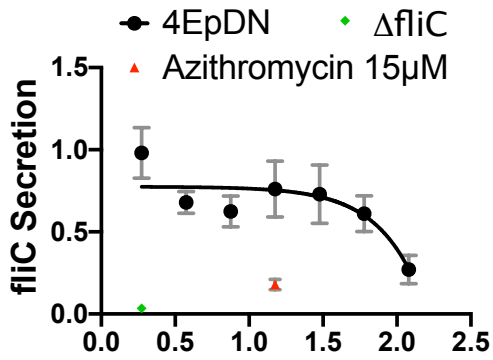

### $\Delta\text{SPI-1}$ *Samonella*

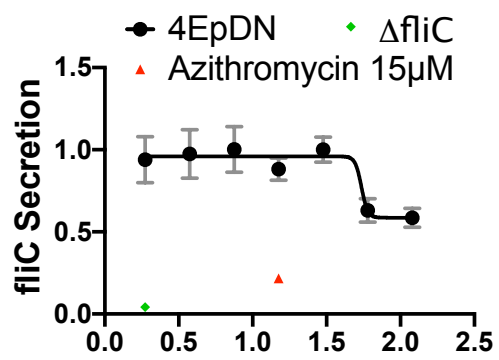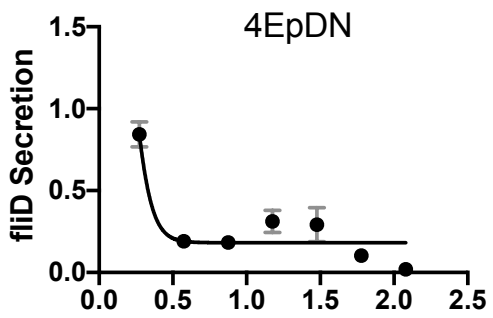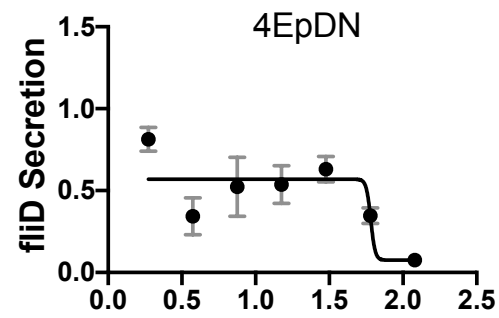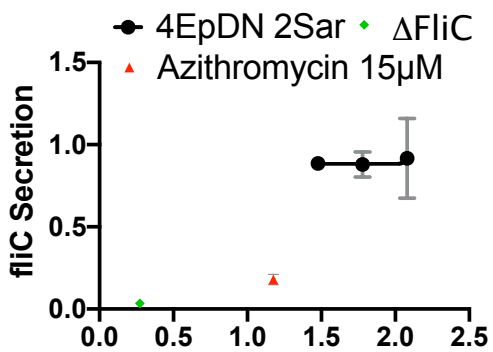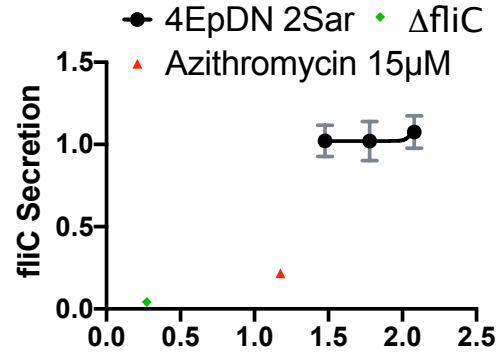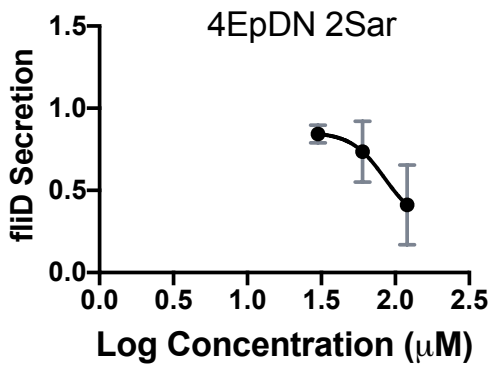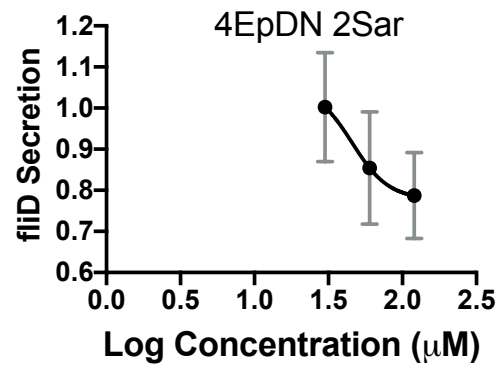



**Figure S4: Cyclic peptomers do not affect secretion of flagellar proteins.** *Salmonella enterica* Typhimurium was grown in LB with increasing concentrations of cyclic peptomers. Secretion of flagellar structural proteins FliC and FliD were assessed by precipitating the secreted proteins and visualizing them with Coomassie blue. A  $\Delta fliC$  mutant and azithromycin (1), which inhibits flagellin secretion, were used as controls. The SPI-1 mutant and WT *Salmonella* were both tested, as flagella substrates can be secreted through both flagellar and SPI-1 T3SS systems. The results are from at least two independent experiments. Error bars are standard errors of the mean.

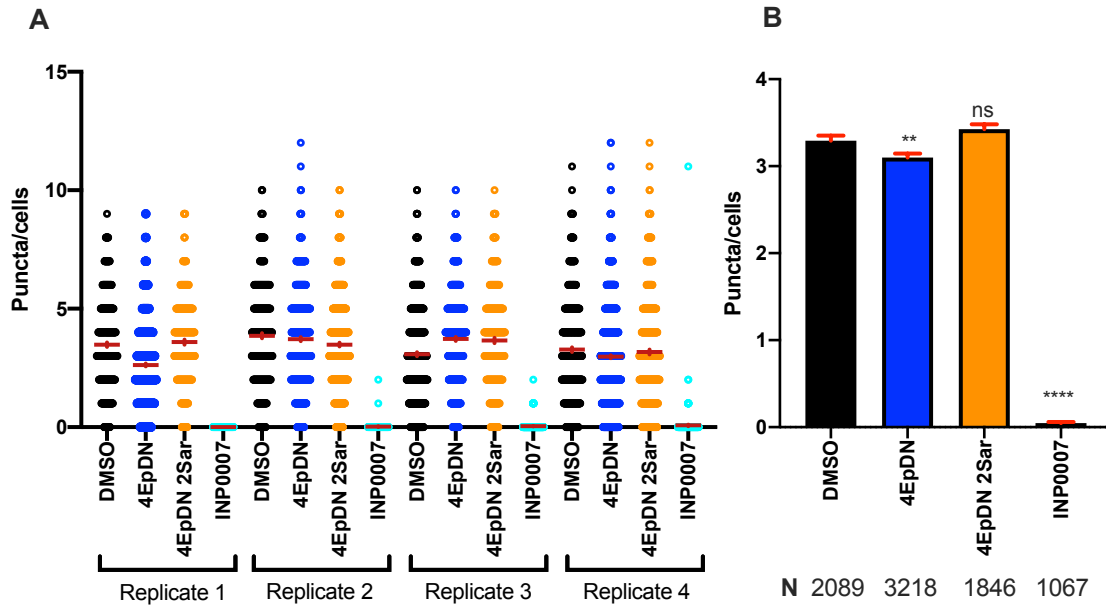

**Figure S5: The cyclic peptomer 4EpDN effect on localization of the *Yersinia* T3SS basal body component YscD.** *Y. enterocolitica* expressing YscD-EGFP was grown under T3SS inducing condition (low Ca<sup>2+</sup>) in the presence of 9 μM cyclic peptomers, 50 μM INP0007, or DMSO. **(A)** Scatter plot of YscD puncta/cell for four replicates. Mean ±SEM was shown in red. Width of distribution of points is proportional to the number of data points at the Y value. **(B)** Mean number of puncta/cell after treatment for all replicates combined ±SEM. Data represents four independent experiments. Non-parametric Kruskal-Wallis test with Dunn's multiple-comparison test was used. \*\*\*\*, P < 0.0001; \*\*, P < 0.005; ns: not significant.

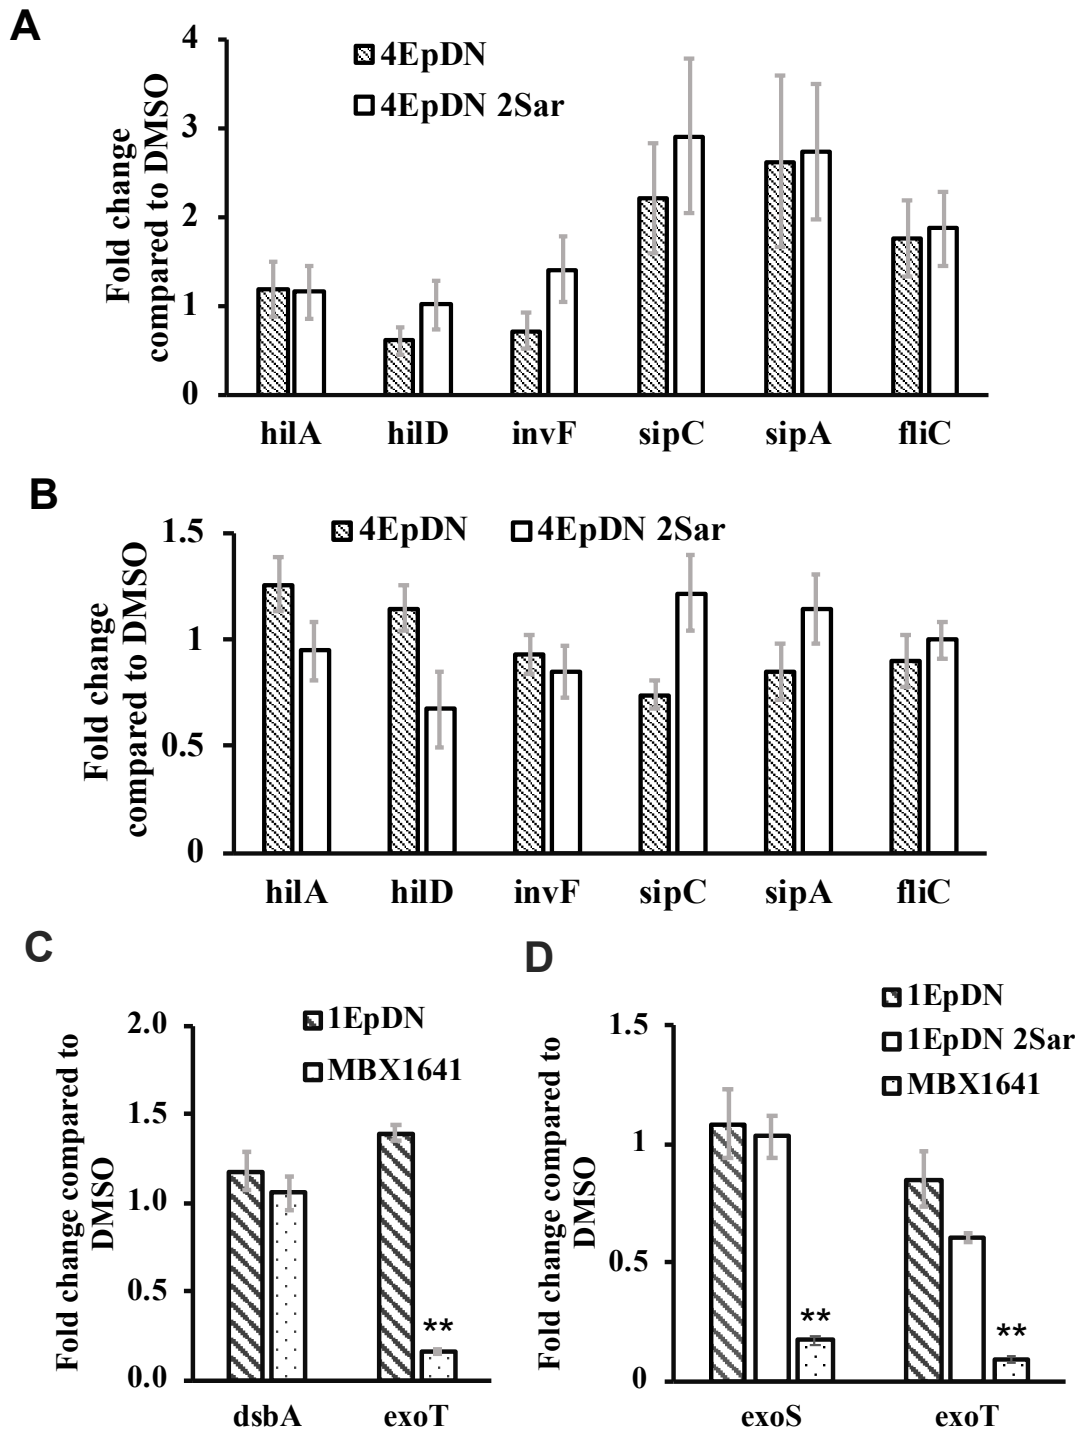

**Figure S6: Cyclic peptomers do not affect transcription of T3SS genes in *Salmonella* and *P. aeruginosa*.** *Salmonella enterica* Typhimurium was grown in LB with 300 mM NaCl in the presence of 9  $\mu$ M cyclic peptomers or DMSO. Samples were taken 2 hrs (A)

and 4 hrs (**B**) after addition of compounds at 37°C and expression of flagellar (*fliC*) and injectisome T3SS (*hilA*, *hilD*, *invF*, *sipC*, *sipA*) genes were assessed using qPCR. *P. aeruginosa* PA103 (**C**) or PA01 (**D**) was grown in low calcium media in the presence of 60M cyclic peptomers or DMSO. Samples were collected 3 hrs after induction for qPCR analysis. The phenoxyacetamide MBX1641 (2), a known T3SS inhibitor predicted to inhibit type III secretion by binding to the T3SS needle subunit (3), was used as a control. Data are from two to three replicates, analyzed by one-way ANOVA with Dunnett's multiple-comparison test. \*\*,  $P < 0.01$ .

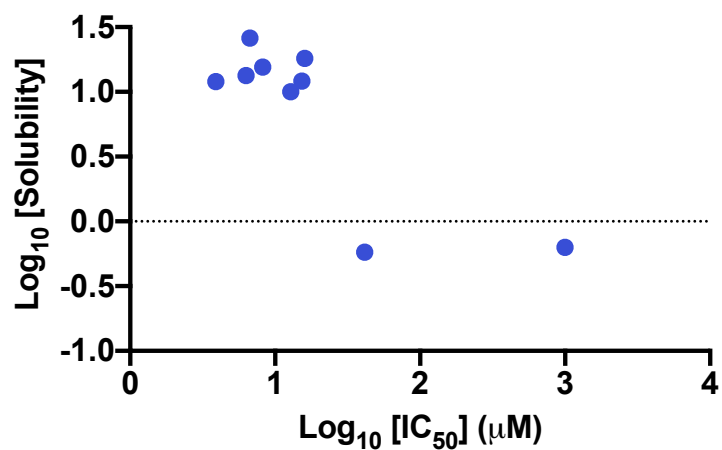

**Figure S7: Relationship between solubility and activity of cyclic peptomers.** IC<sub>50</sub> of stereoisomers and their solubility (table S1) were plotted on a log<sub>10</sub> scale. Average solubility was used when the solubility was measured in different conditions.

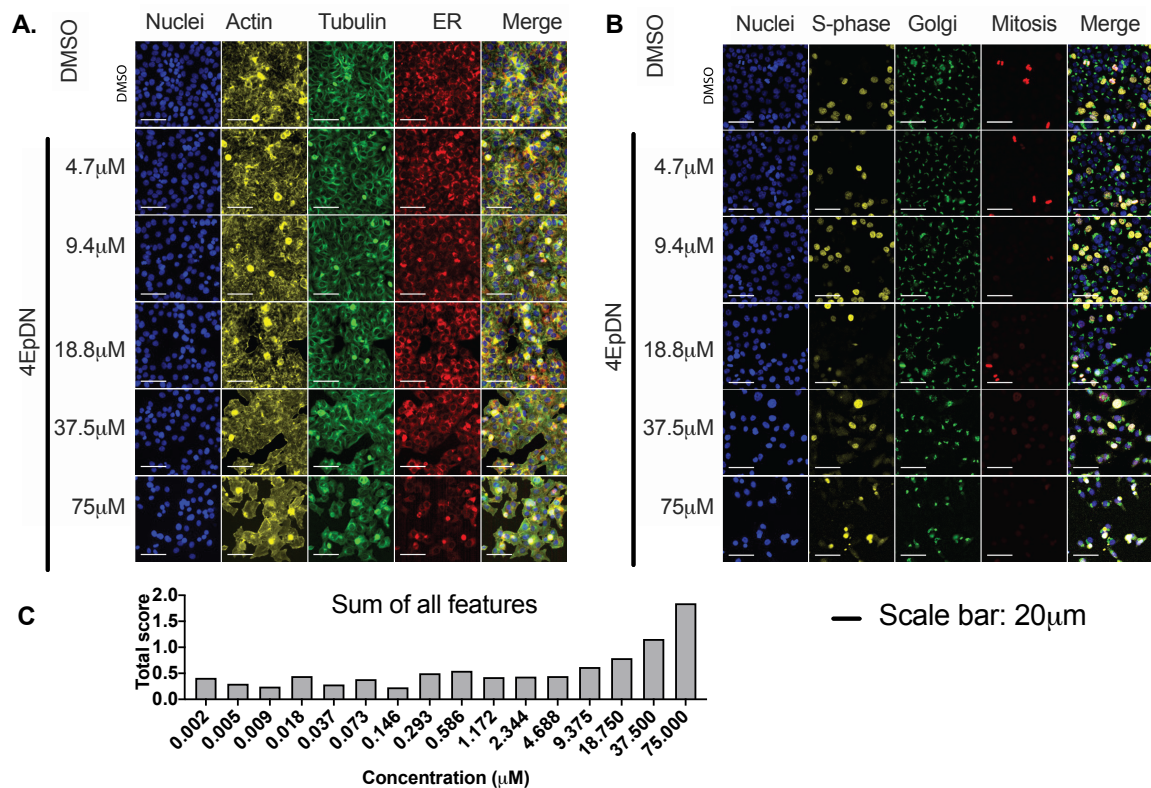

**Figure S8: Effect of cyclic peptomers on HeLa cells.** HeLa cells were incubated with compounds for 48 hrs. Cells were then stained with: **(A)** Stain Set 1: Hoechst, FITC-alpha tubulin, rhodamine-phalloidin (actin), and Calnexin (ER induced protein); or **(B)** Stain set 2: Hoechst, EdU-rhodamine (S-phase detection), anti-Phosphohistone H3 (mitosis marker), and GM130 (Golgi matrix protein). Representative images of cells treated with different concentrations of 4EpDN or DMSO are shown. **(C)** Quantification of all cell features for 4EpDN-treated cells. The total CP score is the square root of sum of square of the difference between treatment and DMSO for all measured features.

**Figure S9:** Characterization of cyclic peptomers. Drawn structures, SMILE structures, molecular weight, LCMS Spectra, and  $^1\text{H-NMR}$  Spectra are shown.

## 1EpDN

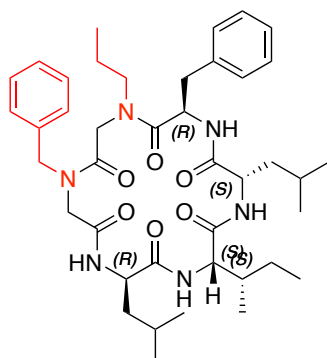

Exact Mass: 732.46  
Molecular Weight: 732.97

SMILE structure:

```
O=C([C@H](CC(C)C)NC([C@@]([C@@H](C)CC)([H])N1)=O)N[C@@H](C(N(CC(N(CC2=CC=CC=C2)CC(N[C@H](CC(C)C)C1=O)=O)=O)CCC)=O)CC3=CC=CC=C3
```

180502\_1\_DPhe\_Leu\_Ile\_DLeu\_Benzylamine\_Propylamine\_cyclized\_biotage\_20 214 (3.955)

1: Scan ES+  
1.42e8

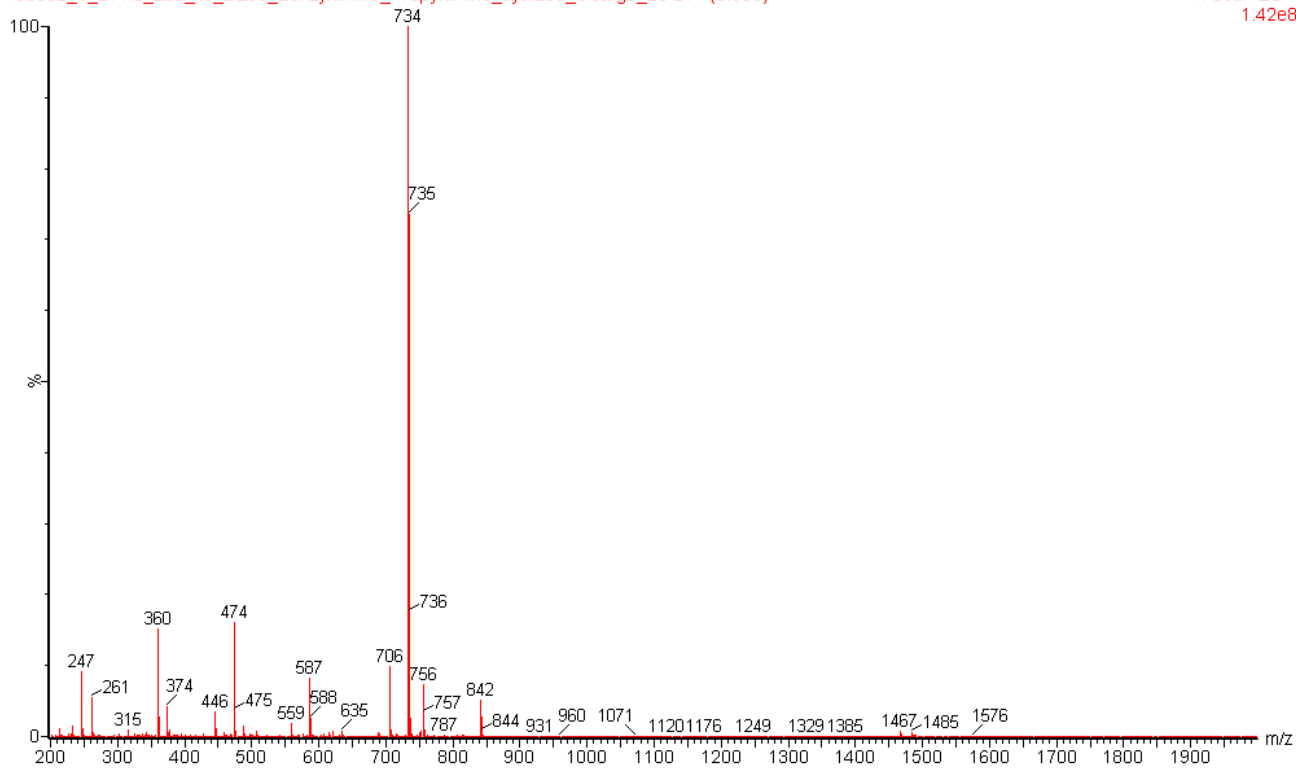

1EpDN ( $^1\text{H}$  NMR, 500 MHz,  $\text{CDCl}_3$ )



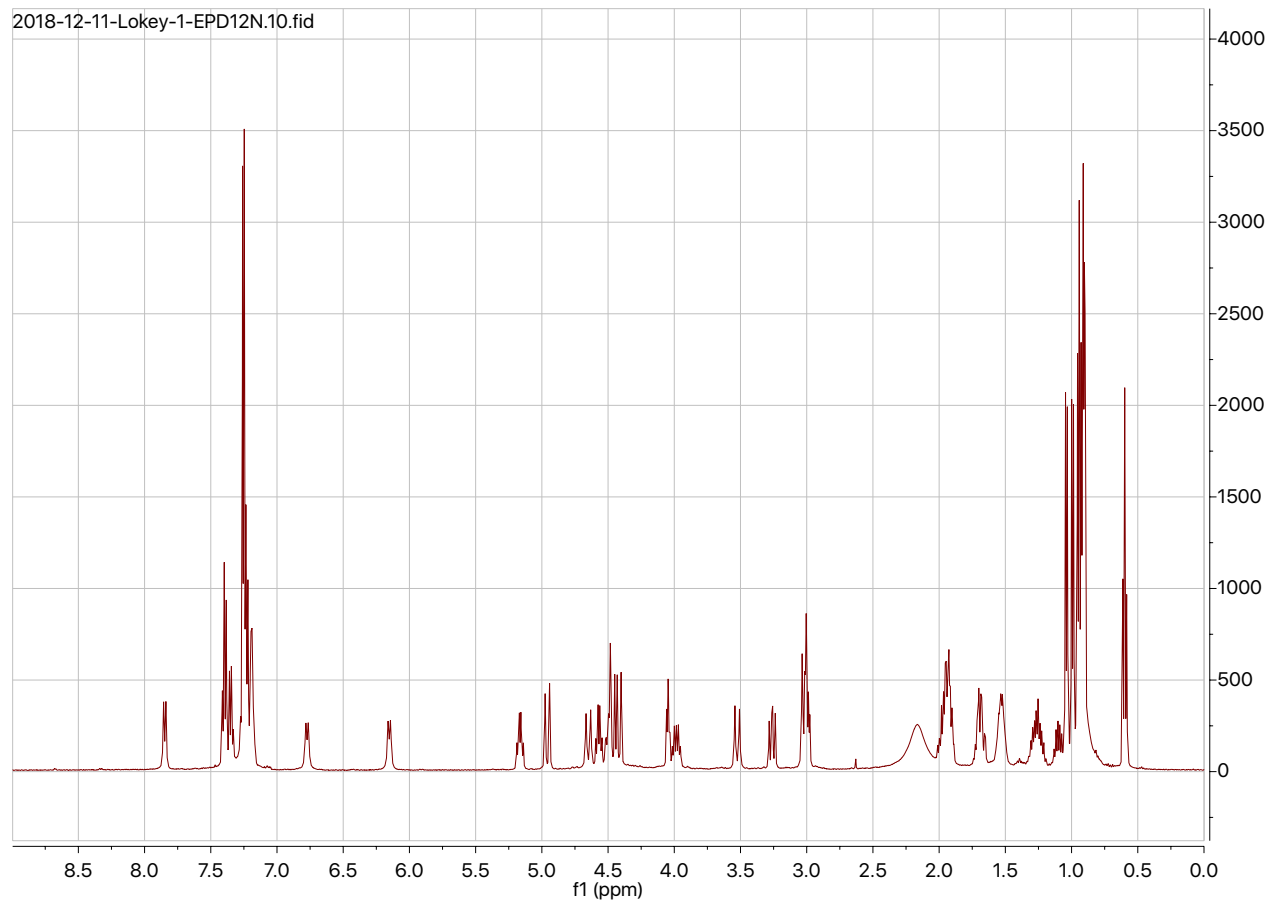

## 2EpDN

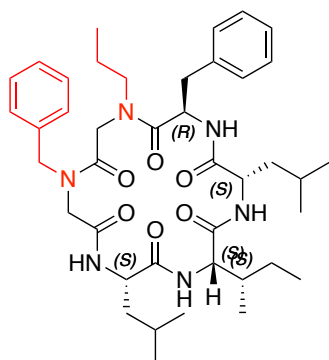

Exact Mass: 732.46  
Molecular Weight: 732.97

SMILE structure:

```
O=C([C@H](CC(C)C)NC([C@@]([C@@H](C)CC)([H]
)N1)=O)N[C@@H](C(N(CC(N(CC2=CC=CC=C2)CC(N
[C@@H](CC(C)C)C1=O)=O)=O)CCC)=O)CC3=CC=CC
=C3
```

180502\_2\_DPhe\_Leu\_Ile\_Leu\_Benzylamine\_Propylamine\_cyclized\_biotage\_25

2: Diode Array  
Range: 1.857

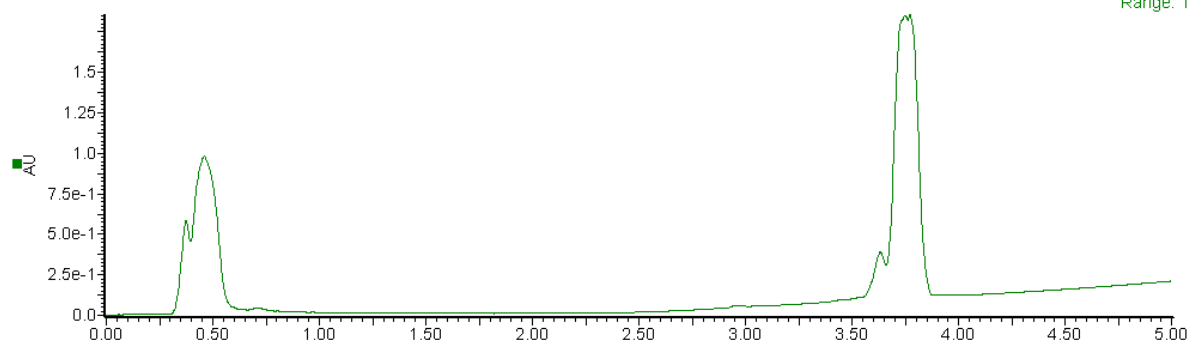

180502\_2\_DPhe\_Leu\_Ile\_Leu\_Benzylamine\_Propylamine\_cyclized\_biotage\_25

1: Scan ES+  
TIC  
6.88e8

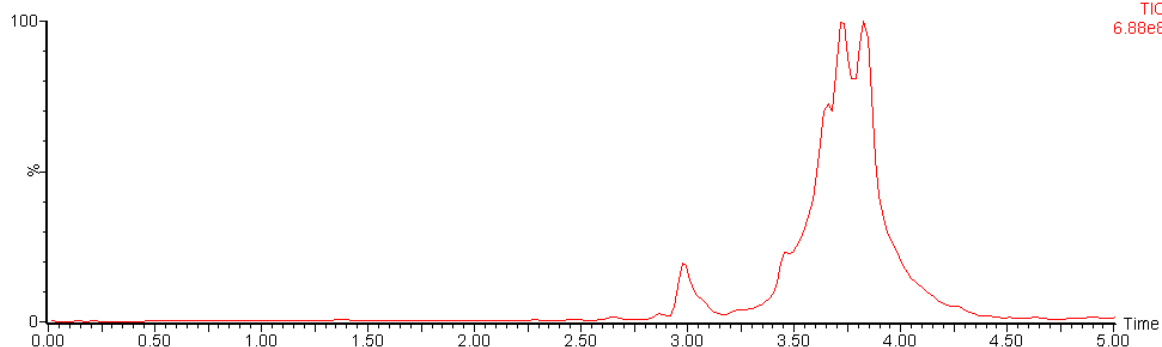

### LCMS spectra

180502\_2\_DPhe\_Leu\_Ile\_Leu\_Benzylamine\_Propylamine\_cyclized\_biotage\_25 201 (3.715)

1: Scan ES+  
1.35e8

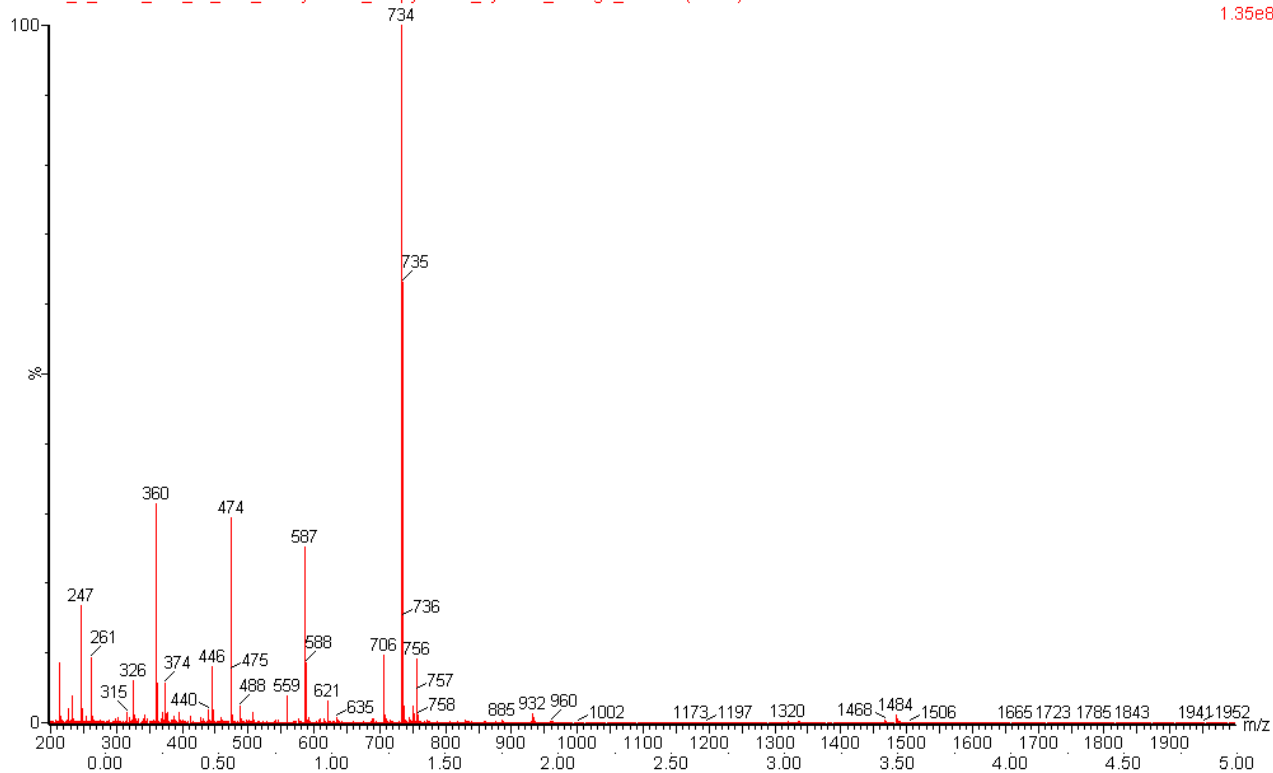

2EpDN ( $^1\text{H}$  NMR, 500 MHz,  $\text{CDCl}_3$ )

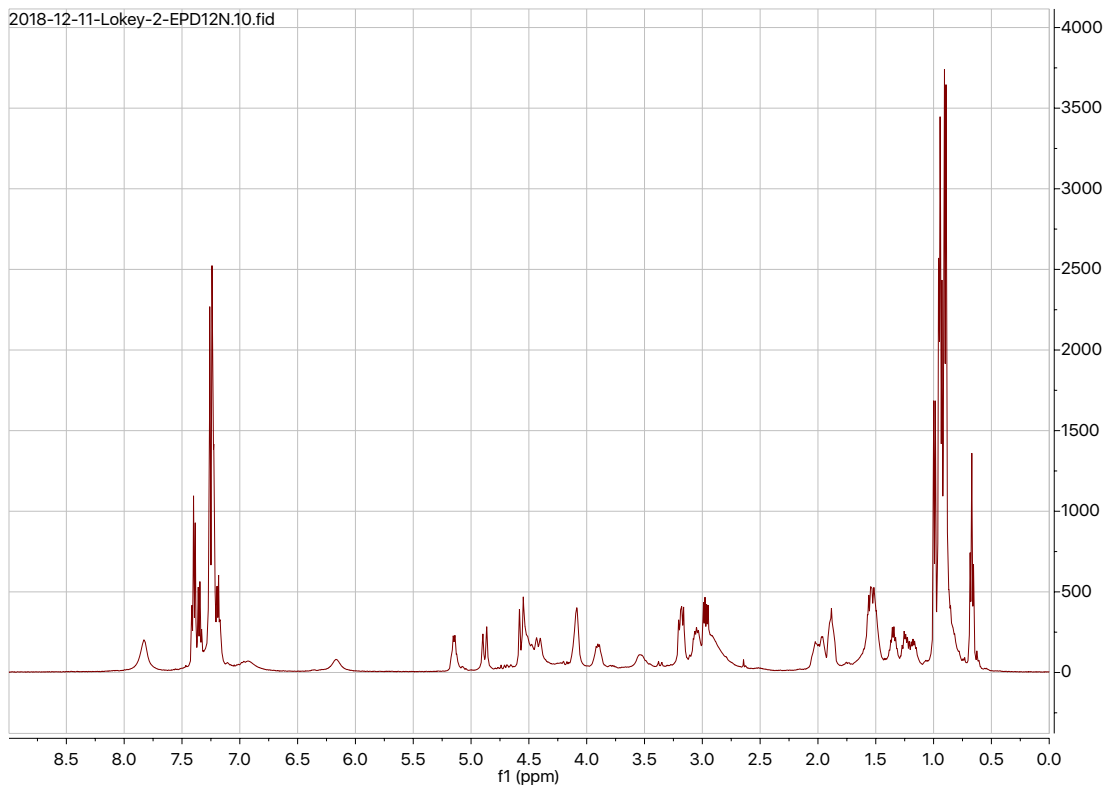

### 3EpDN

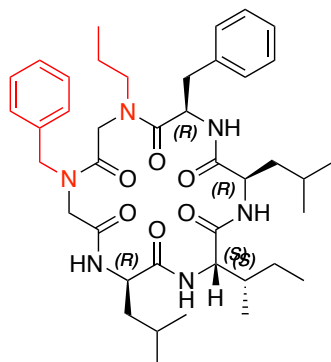

Exact Mass: 732.46  
Molecular Weight: 732.97

SMILE structure:

```
O=C([C@@H](CC(C)C)NC([C@@])([C@@H](C)CC)([H])N1=O)N[C@@H](C(N(CC(N(CC2=CC=CC=C2)CC(N[C@H](CC(C)C)C1=O)=O)=O)CCC)=O)CC3=CC=CC=C3
```

180503\_3\_DPhe\_DLeu\_Ile\_DLeu\_Benzylamine\_Propylamine\_cyclized\_biotage\_14

2: Diode Array  
Range: 1.216

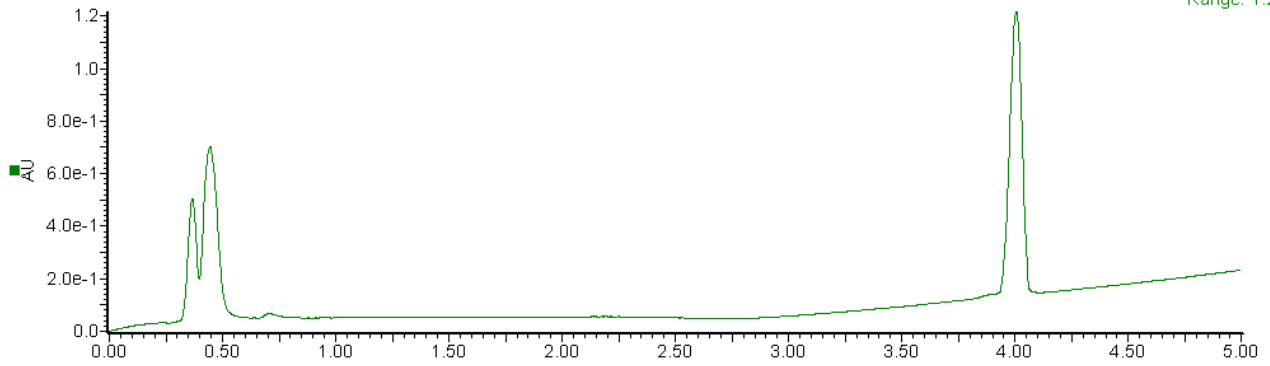

180503\_3\_DPhe\_DLeu\_Ile\_DLeu\_Benzylamine\_Propylamine\_cyclized\_biotage\_14

1: Scan ES+  
TIC  
5.54e8

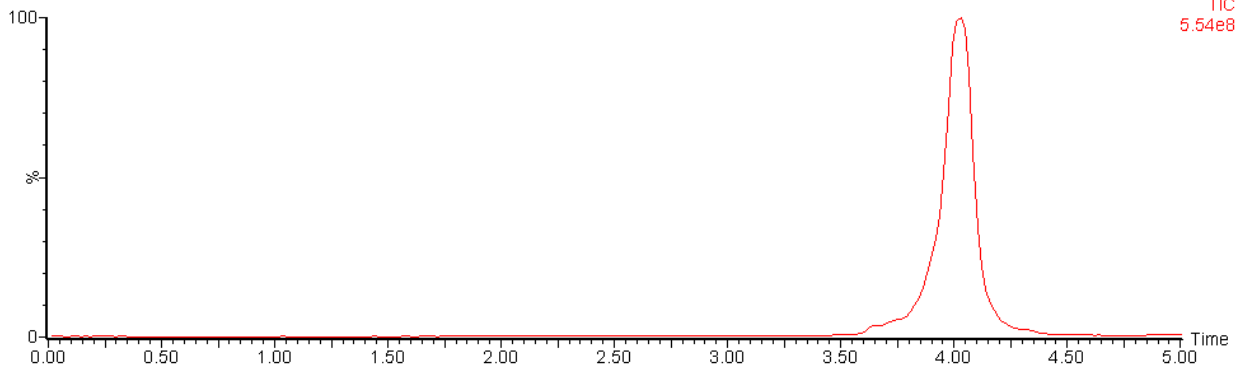

### LCMS spectra

180503\_3\_DPhe\_DLeu\_Ile\_DLeu\_Benzylamine\_Propylamine\_cyclized\_biotage\_14 217 (4.011)

1: Scan ES+  
1.46e8

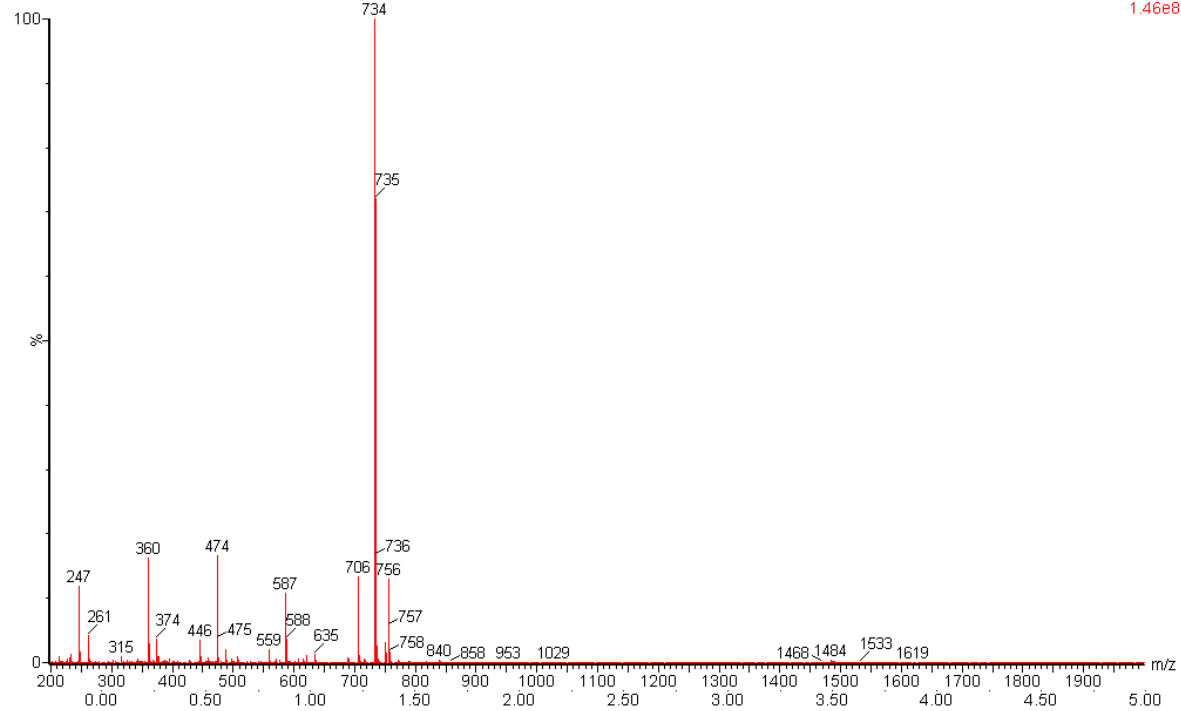

3EpDN ( $^1\text{H}$  NMR, 500 MHz,  $\text{CDCl}_3$ )

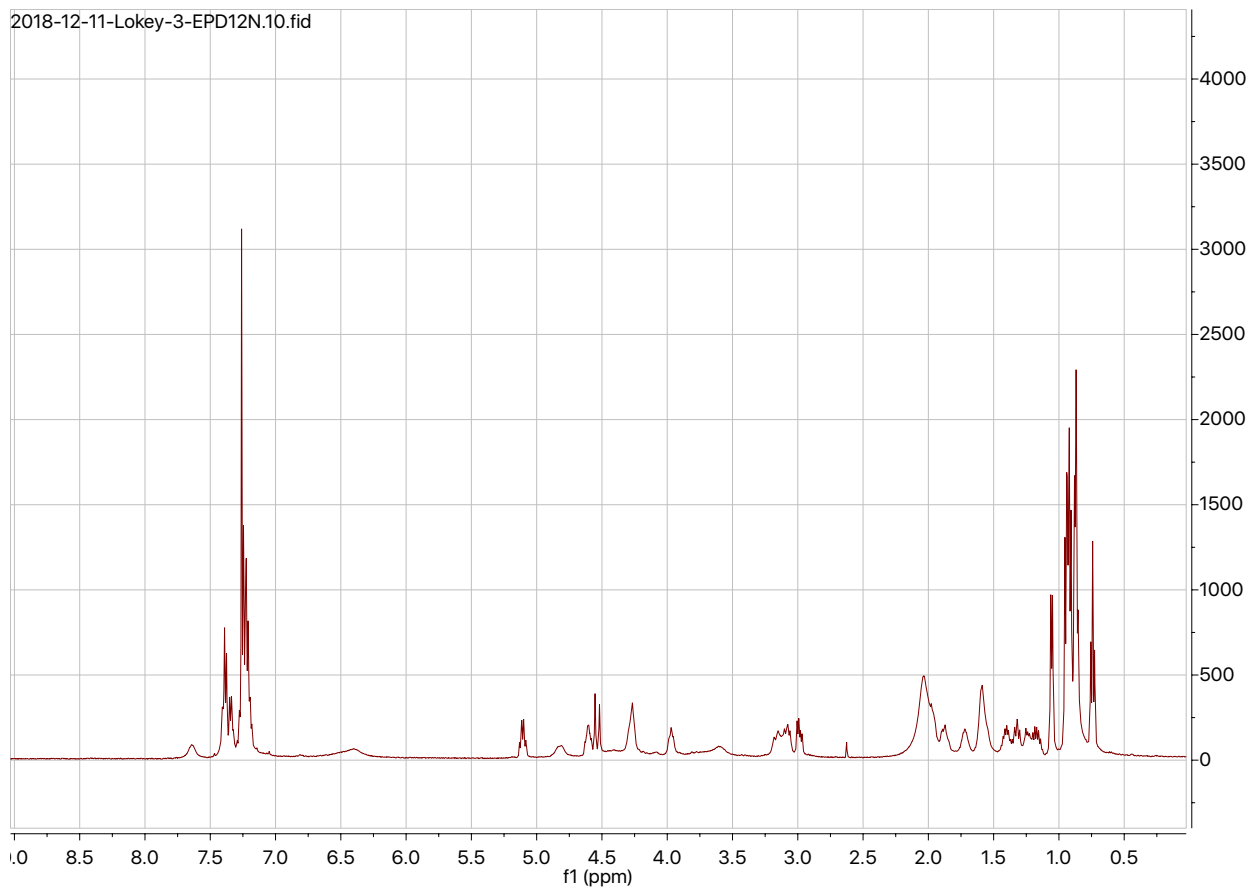

### 4EpDN

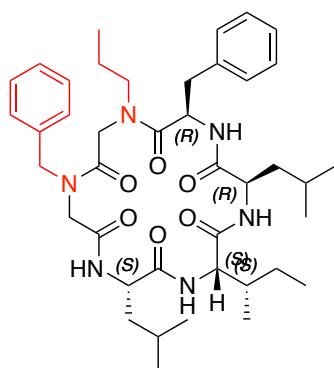

Exact Mass: 732.46  
Molecular Weight: 732.97

SMILE structure:

```
O=C([C@@H](CC(C)C)NC([C@@]([C@@H](C)CC)([H])N1
)=O)N[C@@H](C(N(CC(N(CC2=CC=CC=C2)CC(N[C@@H](
CC(C)C)C1=O)=O)=O)CCC=O)CC3=CC=CC=C3
```

180503\_4\_DPhe\_DLeu\_Ile\_Leu\_Benzylamine\_Propylamine\_cyclized\_biotage\_18

2: Diode Array  
Range: 1.419

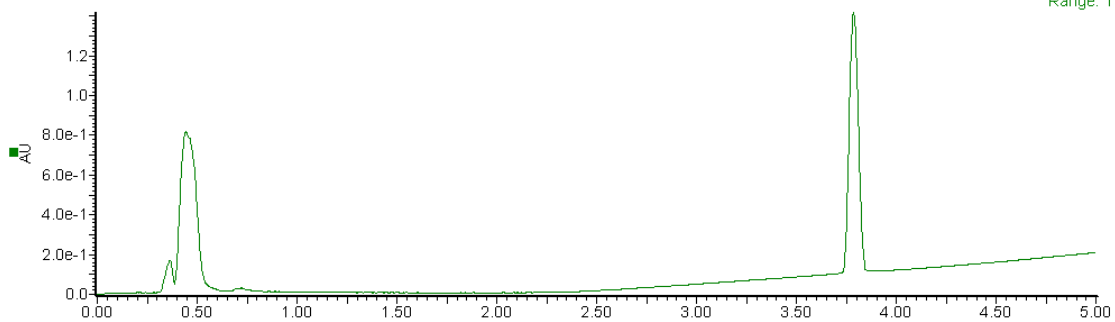

180503\_4\_DPhe\_DLeu\_Ile\_Leu\_Benzylamine\_Propylamine\_cyclized\_biotage\_18

1: Scan ES+  
TIC  
5.21e8

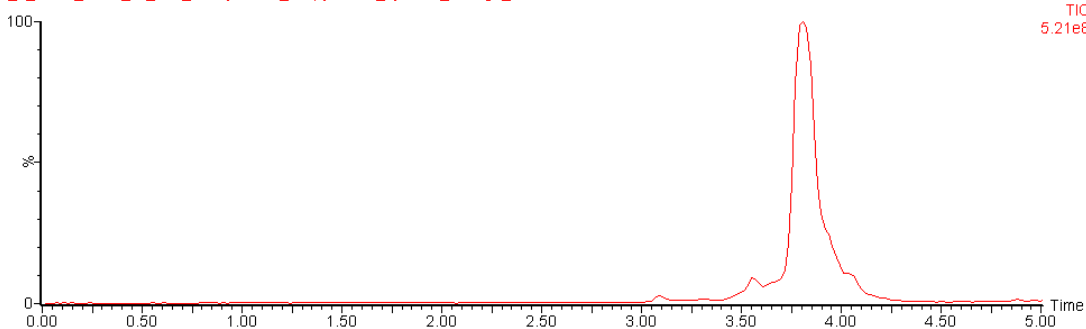

### LCMS spectra

180503\_4\_DPhe\_DLeu\_Ile\_Leu\_Benzylamine\_Propylamine\_cyclized\_biotage\_18 207 (3.826)

1: Scan ES+  
1.31e8

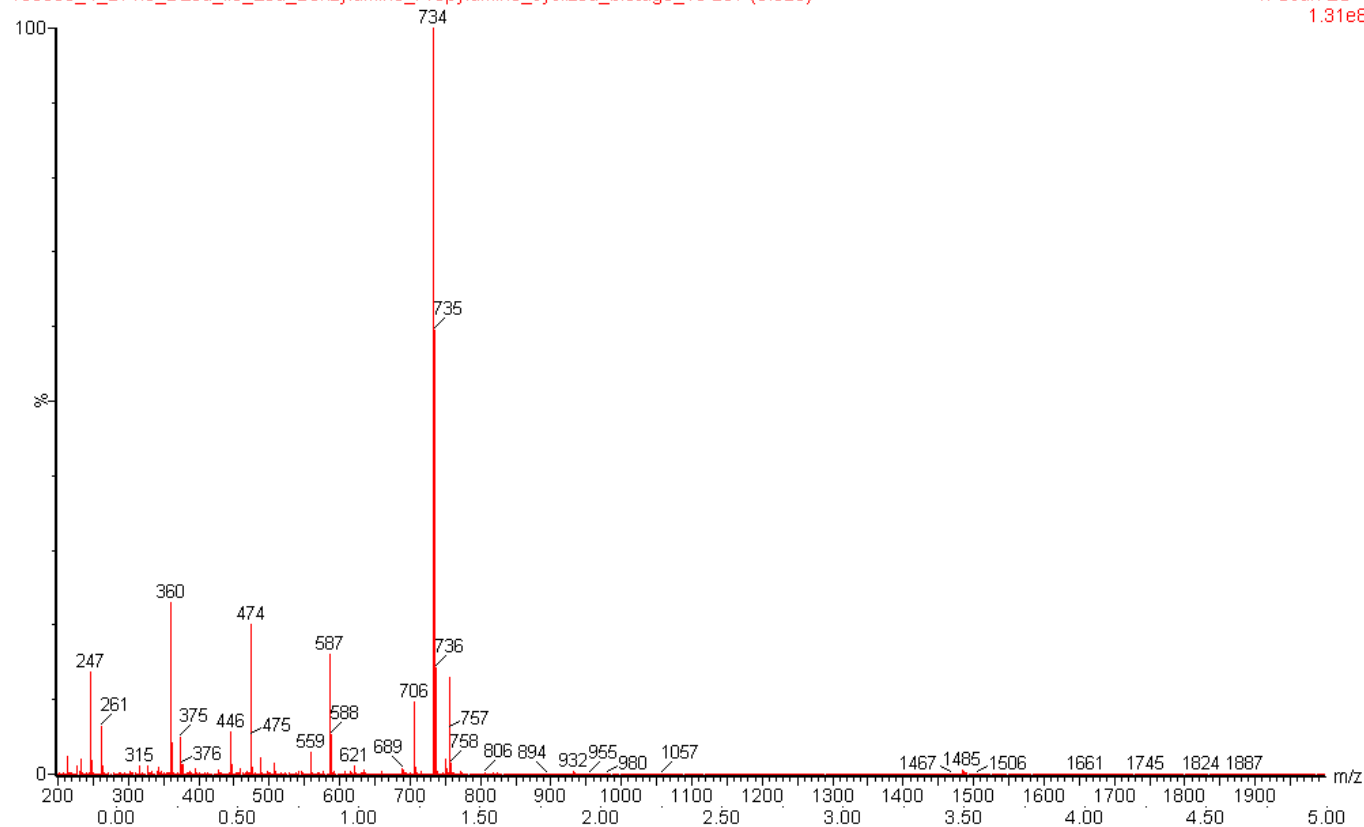

4EpDN ( $^1\text{H}$  NMR, 500 MHz,  $\text{CDCl}_3$ )

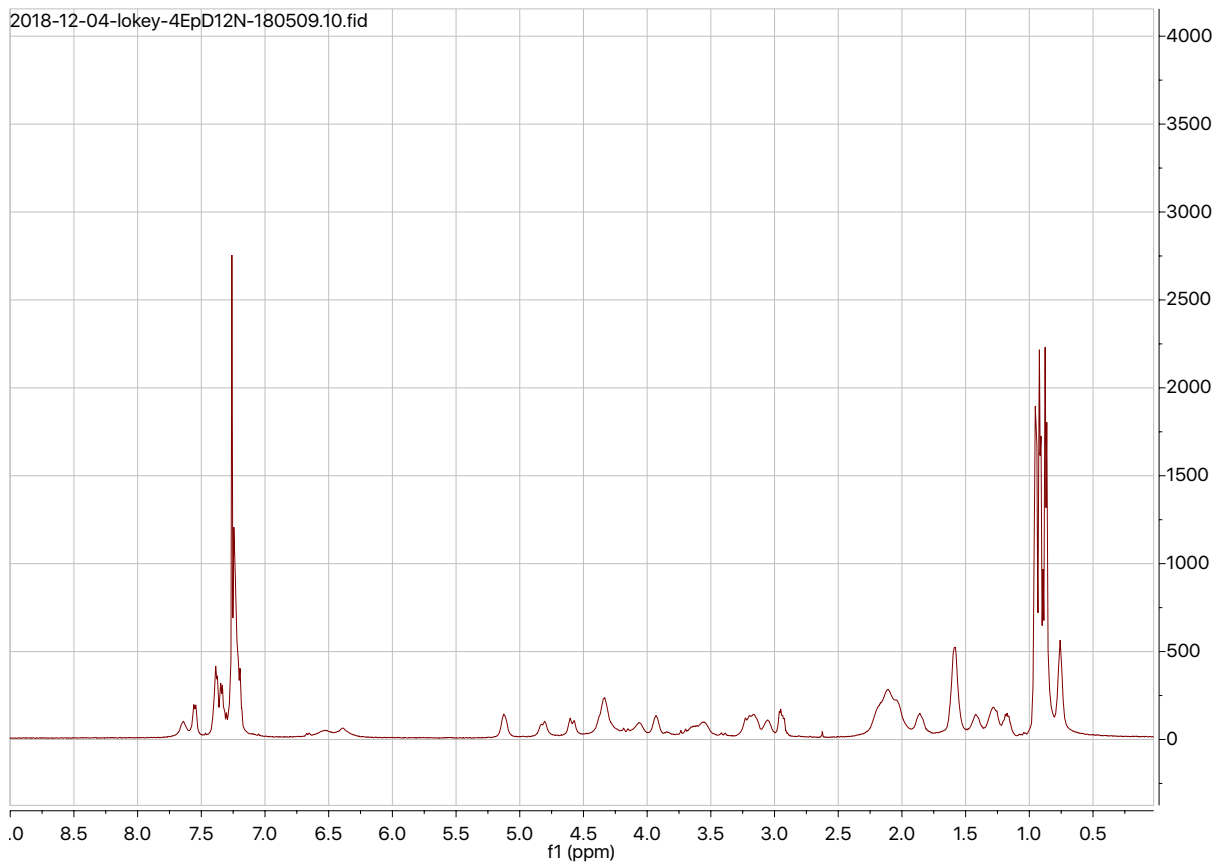

### 5EpDN

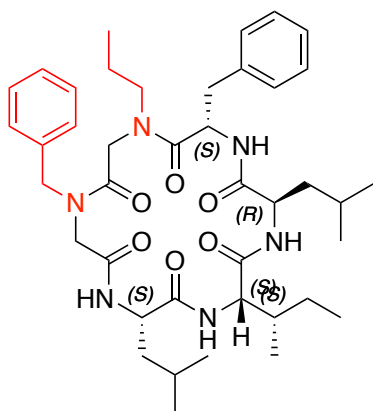

Exact Mass: 732.46  
Molecular Weight: 732.97

SMILE structure:

```
O=C([C@@H](CC(C)C)NC([C@@]([C@@H](C)CC)([H])N1=O)N[C@H](C(N(CC(N(CC2=CC=CC=C2)CC(N[C@@H](CC(C)C)C1=O)=O)=O)CCC)=O)CC3=CC=CC=C3
```

180503\_5\_Phe\_DLeu\_Ile\_Leu\_Benzylamine\_Propylamine\_cyclized\_biotage\_12

2: Diode Array  
Range: 9.169e-1

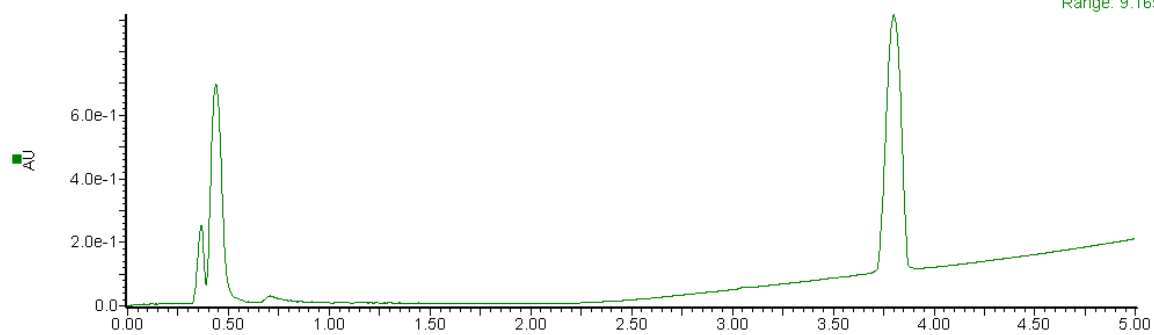

180503\_5\_Phe\_DLeu\_Ile\_Leu\_Benzylamine\_Propylamine\_cyclized\_biotage\_12

1: Scan ES+  
TIC  
5.44e8

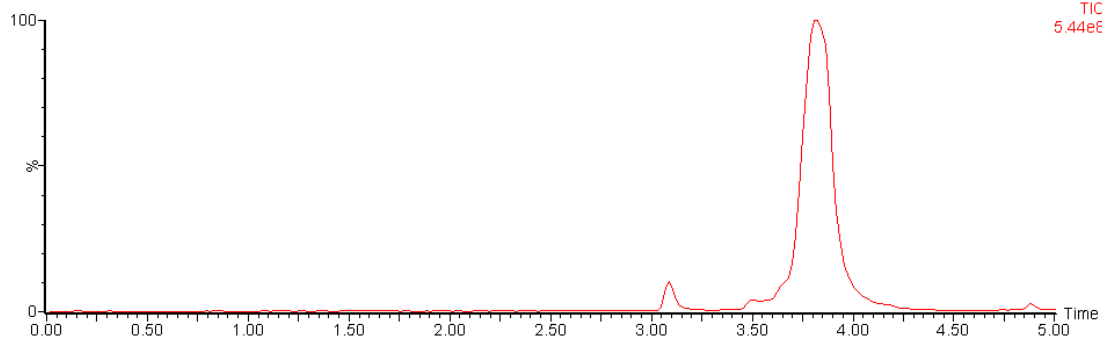

180503\_5\_Phe\_DLeu\_Ile\_Leu\_Benzylamine\_Propylamine\_cyclized\_biotage\_12 206 (3.807)

1: Scan ES+  
1.28e8

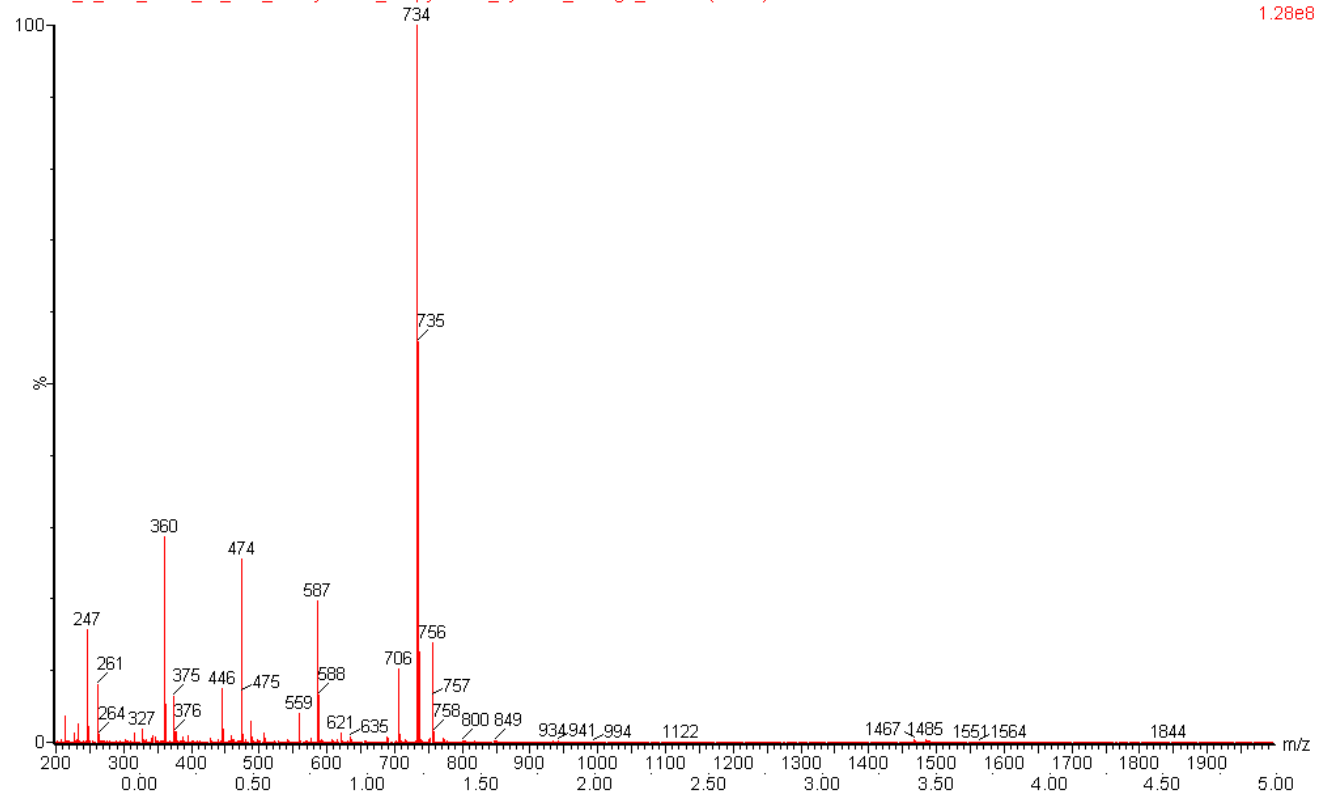

5EpDN (<sup>1</sup>H NMR, 500 MHz, CDCl<sub>3</sub>)



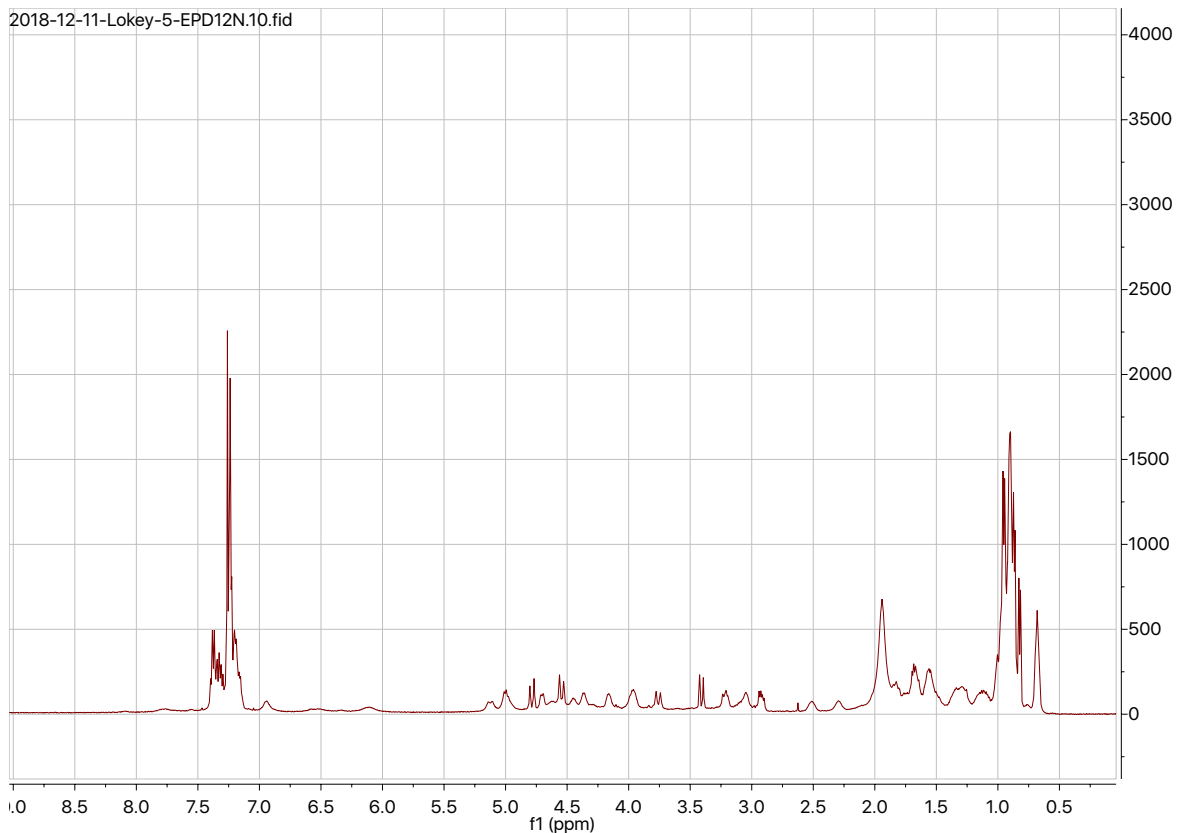

### 6EpDN

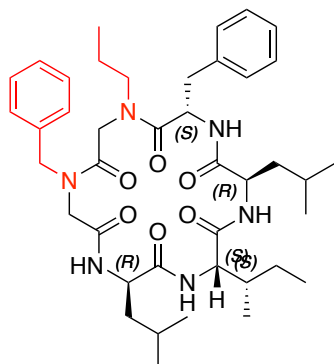

Exact Mass: 732.46  
Molecular Weight: 732.97

SMILE structure:

```
O=C([C@@H](CC(C)C)NC([C@@]([C@@H](C)CC)([H])N1)=O)N[C@H](C(N(CC(N(CC2=CC=CC=C2)CC(N[C@H](CC(C)C)C1=O)=O)=O)CCC)=O)CC3=CC=CC=C3
```

180504\_6\_Phe\_DLeu\_Ile\_DLeu\_Benzylamine\_Propylamine\_cyclized\_3\_biotage\_16

2: Diode Array  
Range: 1.422

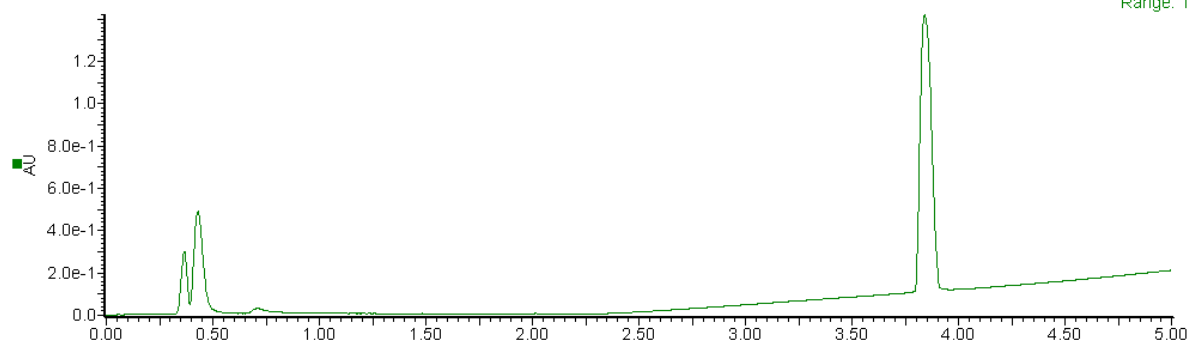

180504\_6\_Phe\_DLeu\_Ile\_DLeu\_Benzylamine\_Propylamine\_cyclized\_3\_biotage\_16

1: Scan ES+  
TIC  
5.67e8

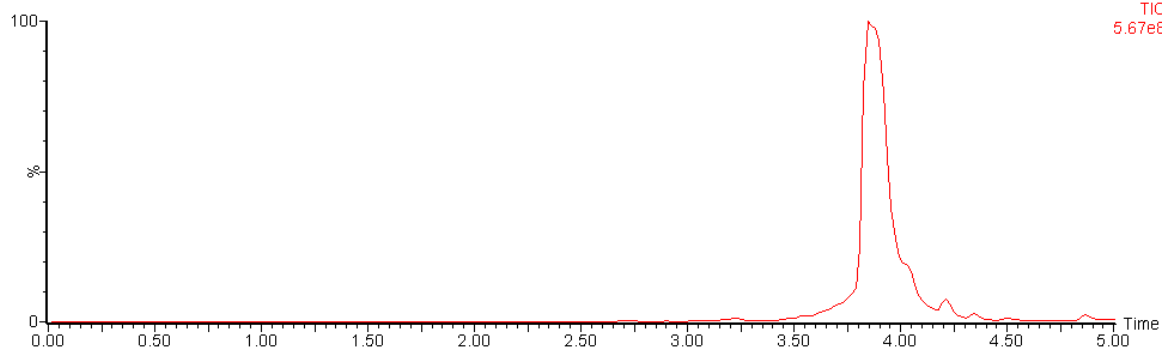

### LCMS spectra

180504\_6\_Phe\_DLeu\_Ile\_DLeu\_Benzylamine\_Propylamine\_cyclized\_3\_biotage\_16 208 (3.844)

1: Scan ES+  
1.37e8

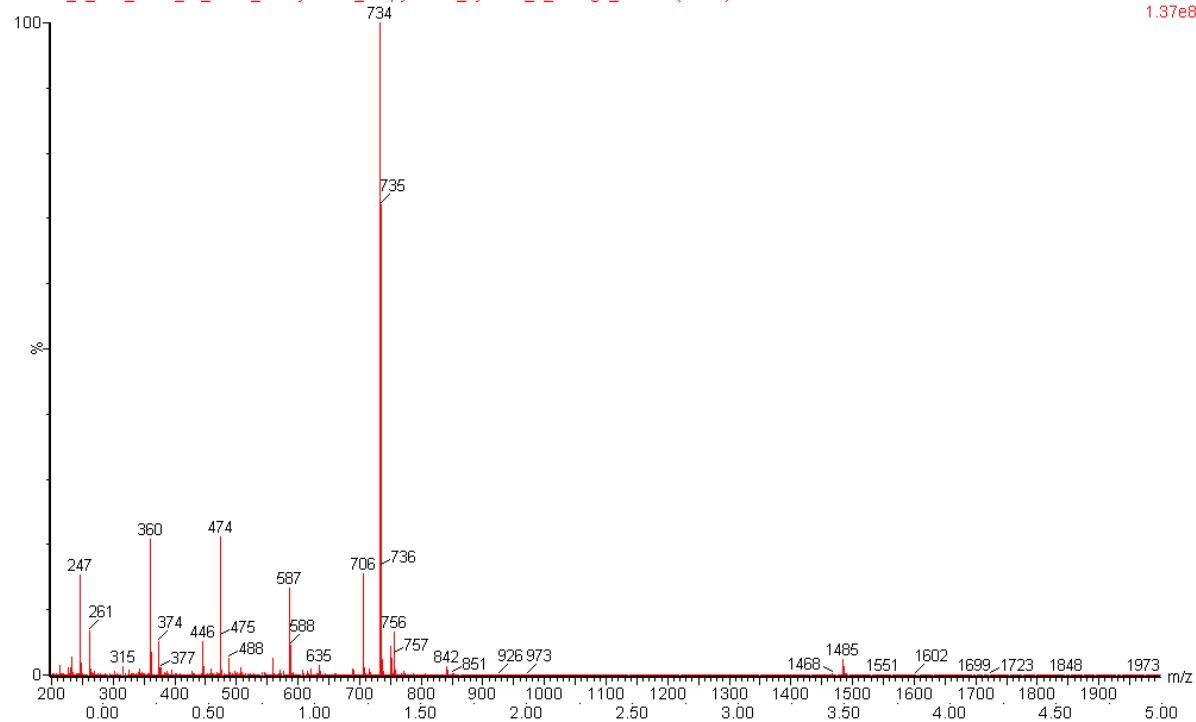

6EpDN ( $^1\text{H}$  NMR, 500 MHz,  $\text{CDCl}_3$ )

2018-12-11-Lokey-6-EPD12N.10.fid

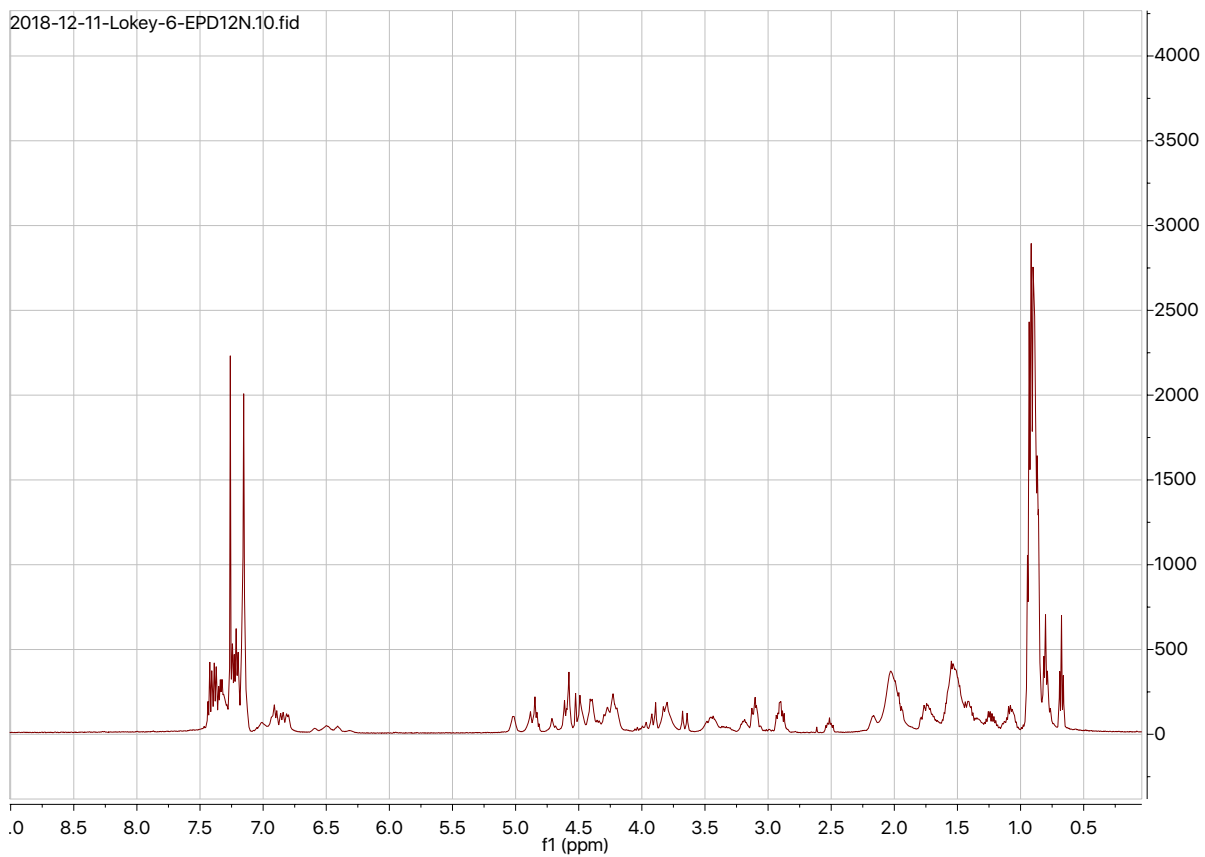

### 7EpDN

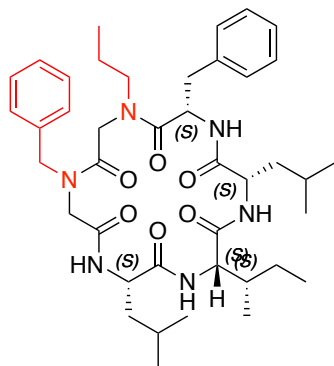

Exact Mass: 732.46  
Molecular Weight: 732.97

SMILE structure:

```
O=C([C@H](CC(C)C)NC([C@@]([C@@H](C)CC)([H])N1)=O)N[C@H](C(N(CC(N(CC2=CC=CC=C2)CC(N[C@@H](CC(C)C)C1=O)=O)=O)CC)=O)CC3=CC=CC=C3
```

180503\_7\_Phe\_Leu\_Ile\_Leu\_Benzylamine\_Propylamine\_cyclized\_biotage\_16

2: Diode Array  
Range: 6.489e-1

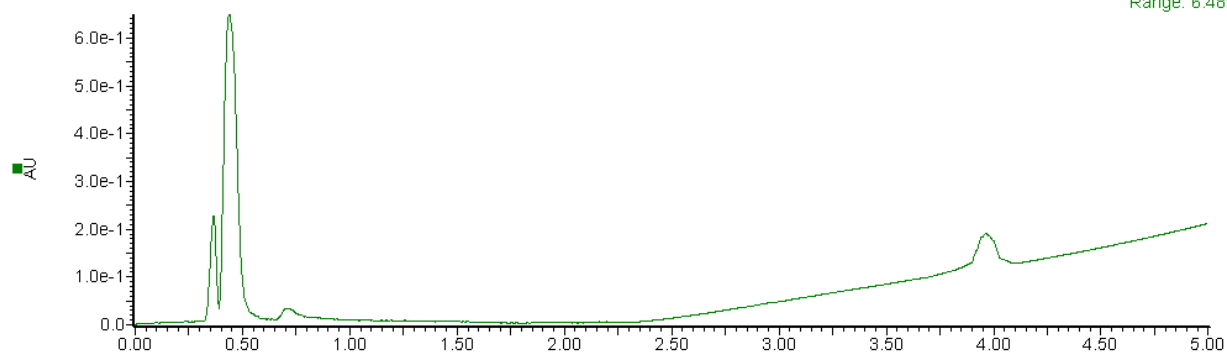

180503\_7\_Phe\_Leu\_Ile\_Leu\_Benzylamine\_Propylamine\_cyclized\_biotage\_16

1: Scan ES+  
TIC  
3.71e8

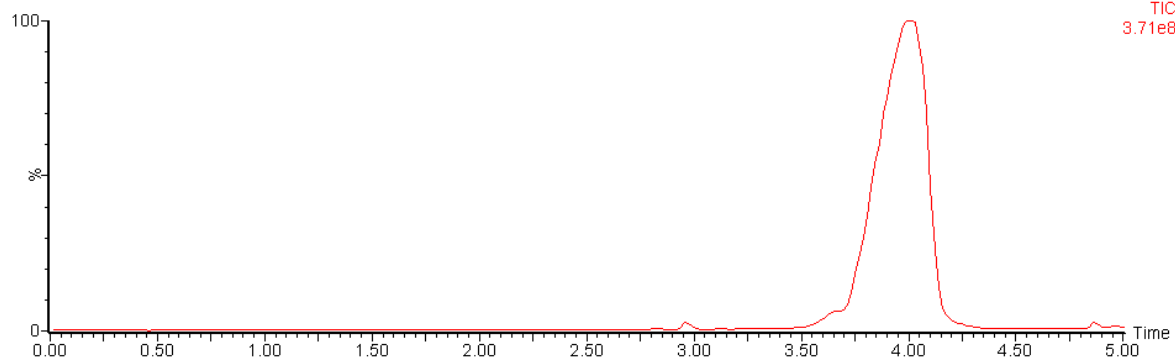

### LCMS spectra

180503\_7\_Phe\_Leu\_Ile\_Leu\_Benzylamine\_Propylamine\_cyclized\_biotage\_16 217 (4.011)

1: Scan ES+  
8.67e7

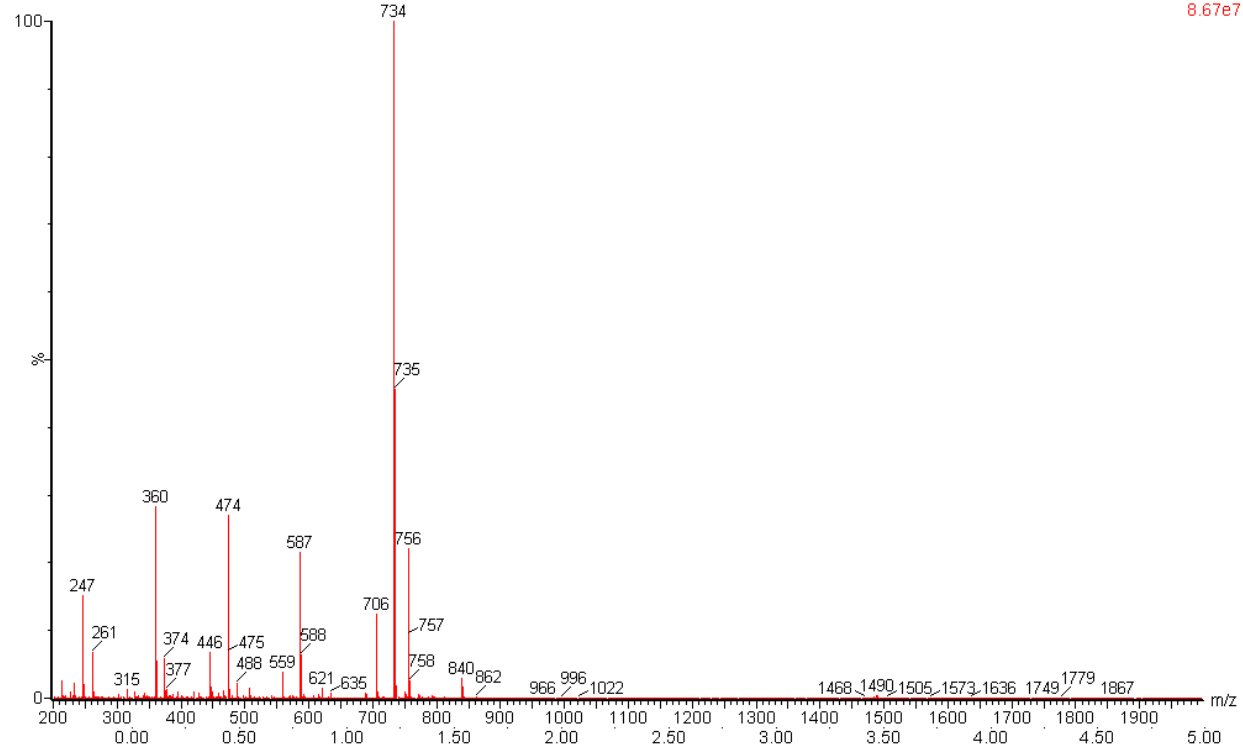

7EpDN ( $^1\text{H}$  NMR, 500 MHz,  $\text{CDCl}_3$ )

2018-12-11-Lokey-7-EPD12N.10.fid

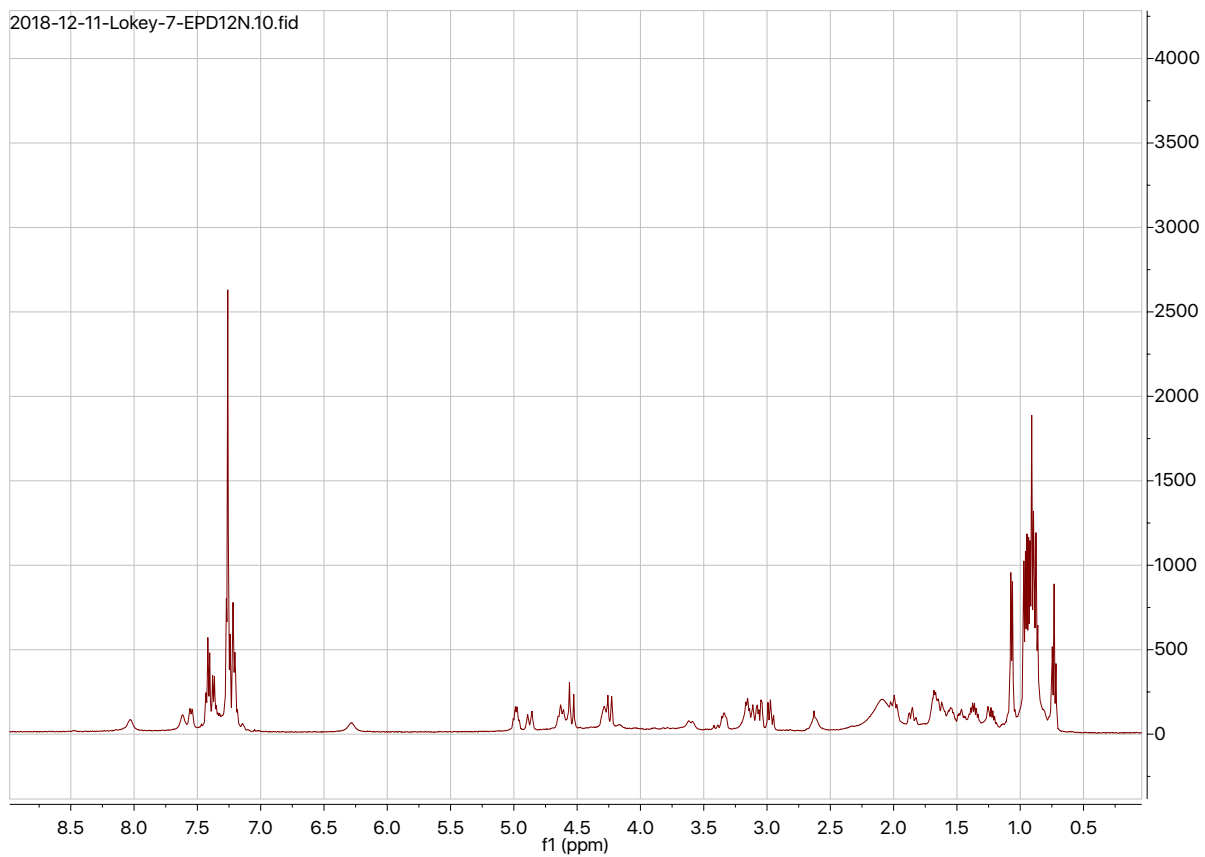

### 8EpDN

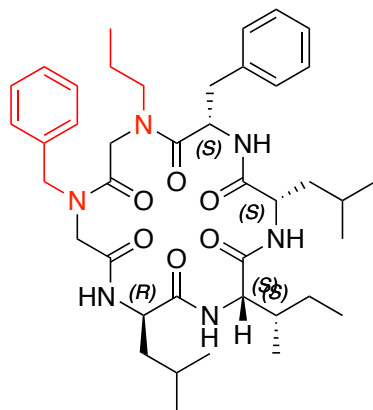

Exact Mass: 732.46  
Molecular Weight: 732.97

SMILE structure:

```
O=C([C@H](CC(C)C)NC([C@@]([C@@H](C)CC)([H])N1)=O)N[C@H](C(N(CC(N(CC2=CC=CC=C2)CC(N[C@H](CC(C)C)C1=O)=O)=O)CCC)=O)CC3=CC=C  
C=C3
```

180503\_8\_Phe\_Leu\_Ile\_DLeu\_Benzylamine\_Propylamine\_cyclized\_biotage\_10

2: Diode Array  
Range: 7.206e-1

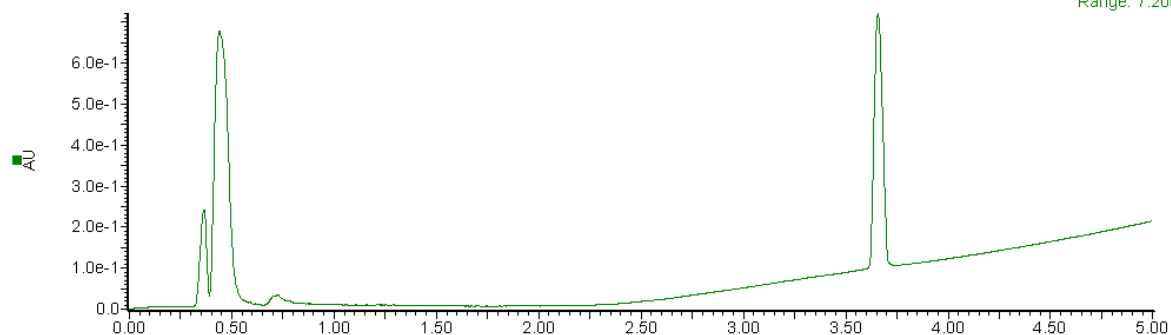

180503\_8\_Phe\_Leu\_Ile\_DLeu\_Benzylamine\_Propylamine\_cyclized\_biotage\_10

1: Scan ES+  
TIC  
5.62e8

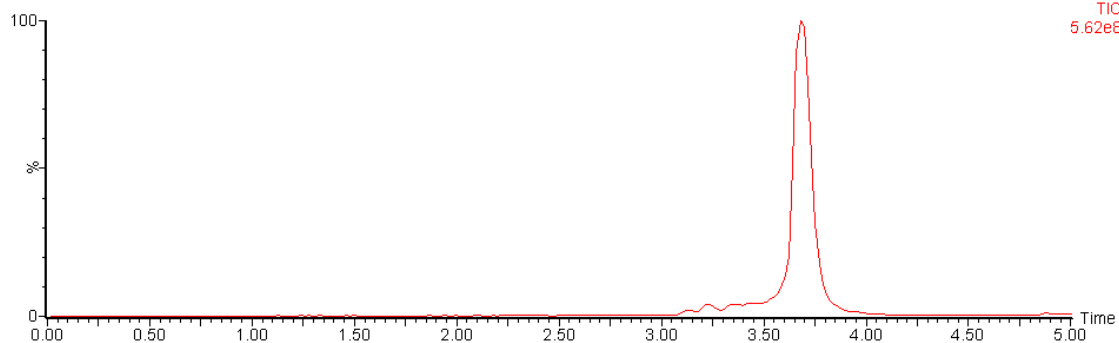

### LCMS spectra

180503\_8\_Phe\_Leu\_Ile\_DLeu\_Benzylamine\_Propylamine\_cyclized\_biotage\_10 199 (3.678)

1: Scan ES+  
1.24e8

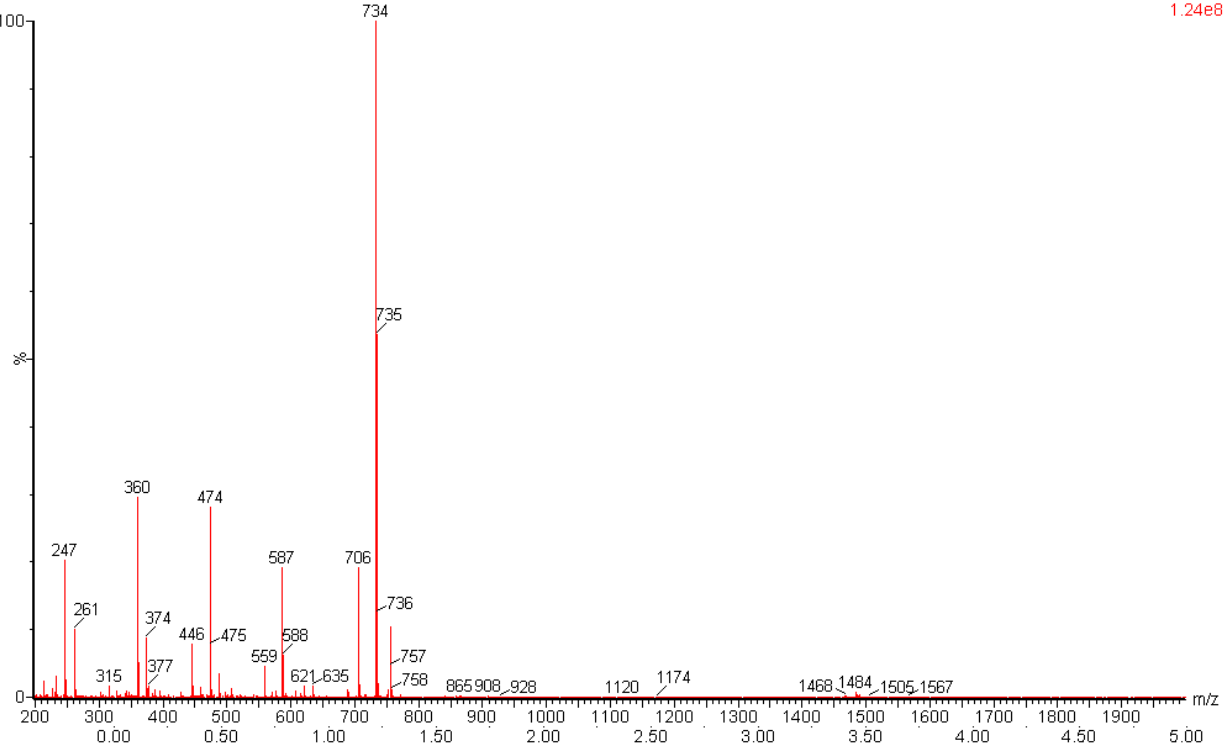

8EpDN ( $^1\text{H}$  NMR, 500 MHz,  $\text{CDCl}_3$ )

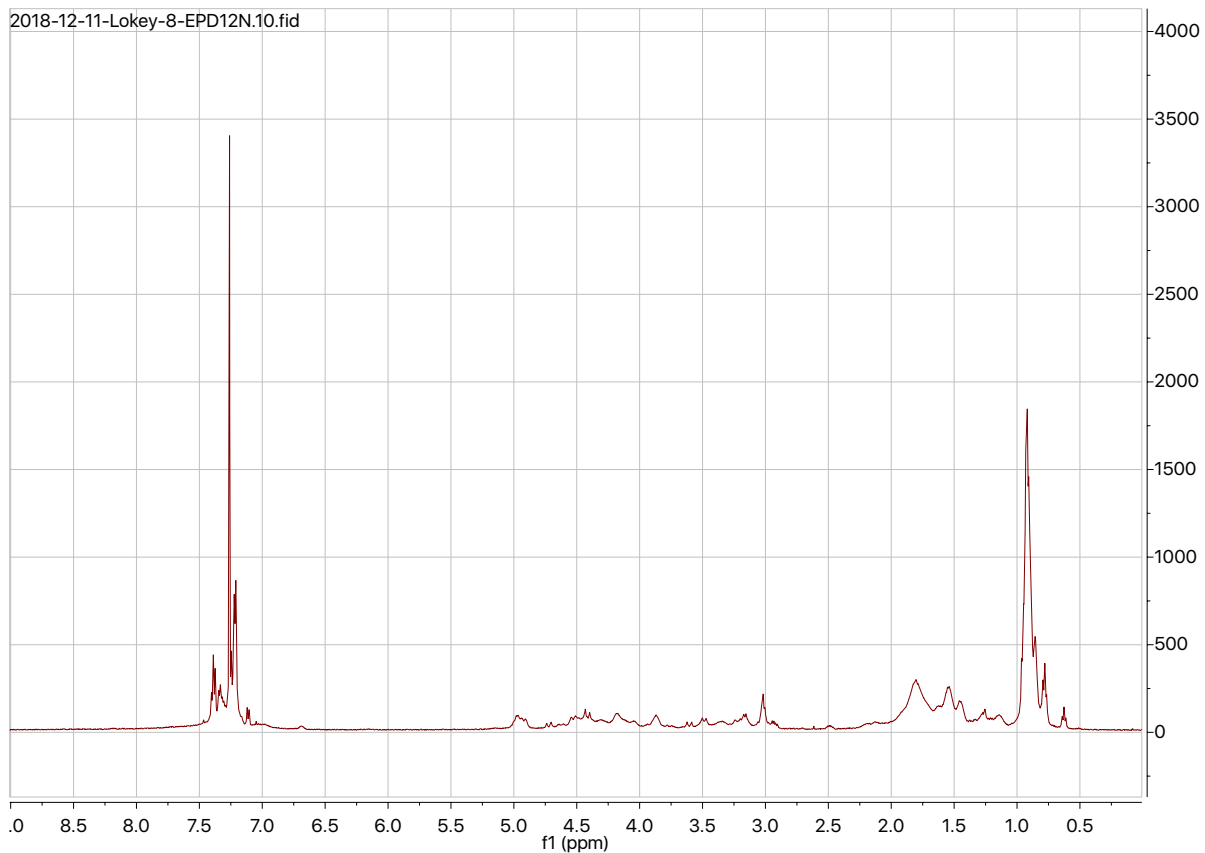

### 9EpDN

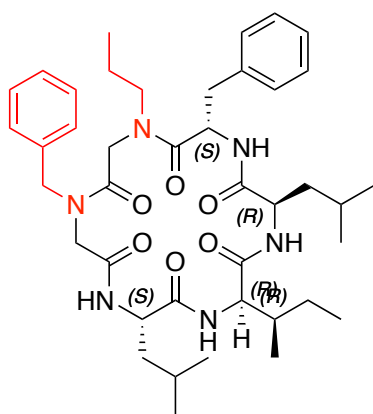

Exact Mass: 732.46  
Molecular Weight: 732.97

SMILE structure:

```
O=C([C@@H](CC(C)C)NC([C@]([C@H](C)CC)([H])N1)=O)N[C@H](C(N(CC(N(CC2=CC=CC=C2)C(C(N[C@@H](CC(C)C)C1=O)=O)=O)CCC)=O)CC3=CC=CC=C3
```

180503\_9\_Phe\_DLeu\_Dlle\_Leu\_Benzylamine\_Propylamine\_cyclized\_biotage\_15

2: Diode Array  
Range: 1.423

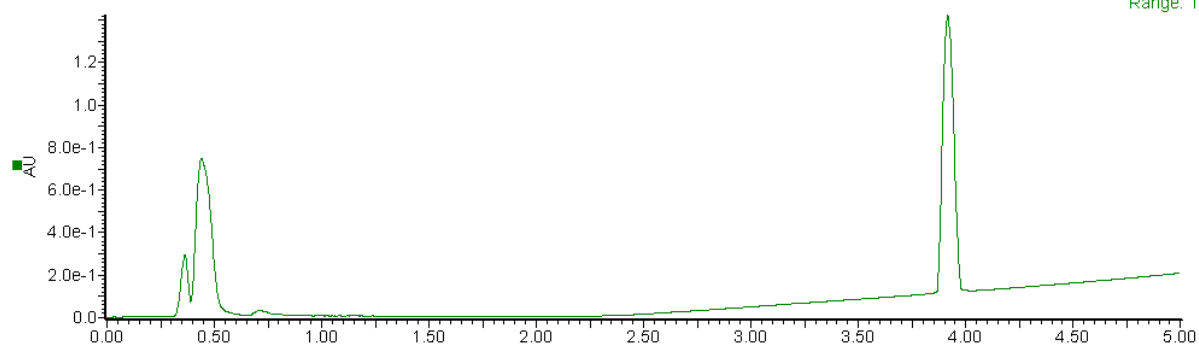

180503\_9\_Phe\_DLeu\_Dlle\_Leu\_Benzylamine\_Propylamine\_cyclized\_biotage\_15

1: Scan ES+  
TIC  
4.96e8

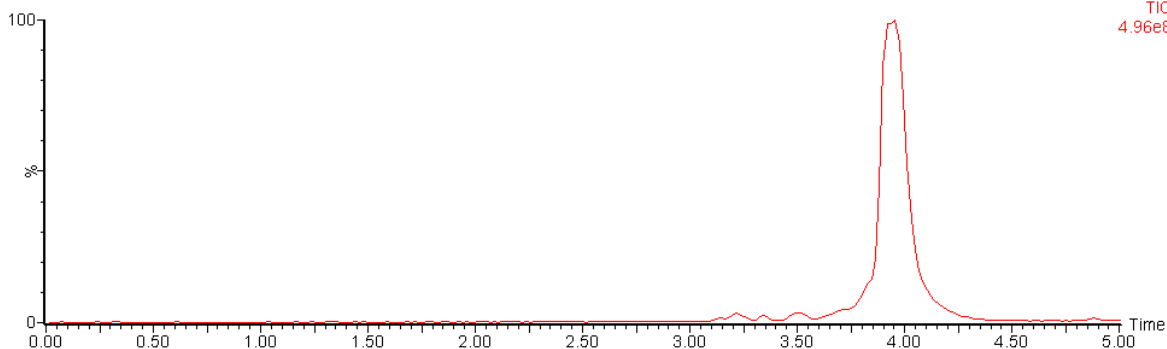

LCMS spectra

180503\_9\_Phe\_DLeu\_Dlle\_Leu\_Benzylamine\_Propylamine\_cyclized\_biotage\_15 210 (3.881)

1: Scan ES+  
4.66e7

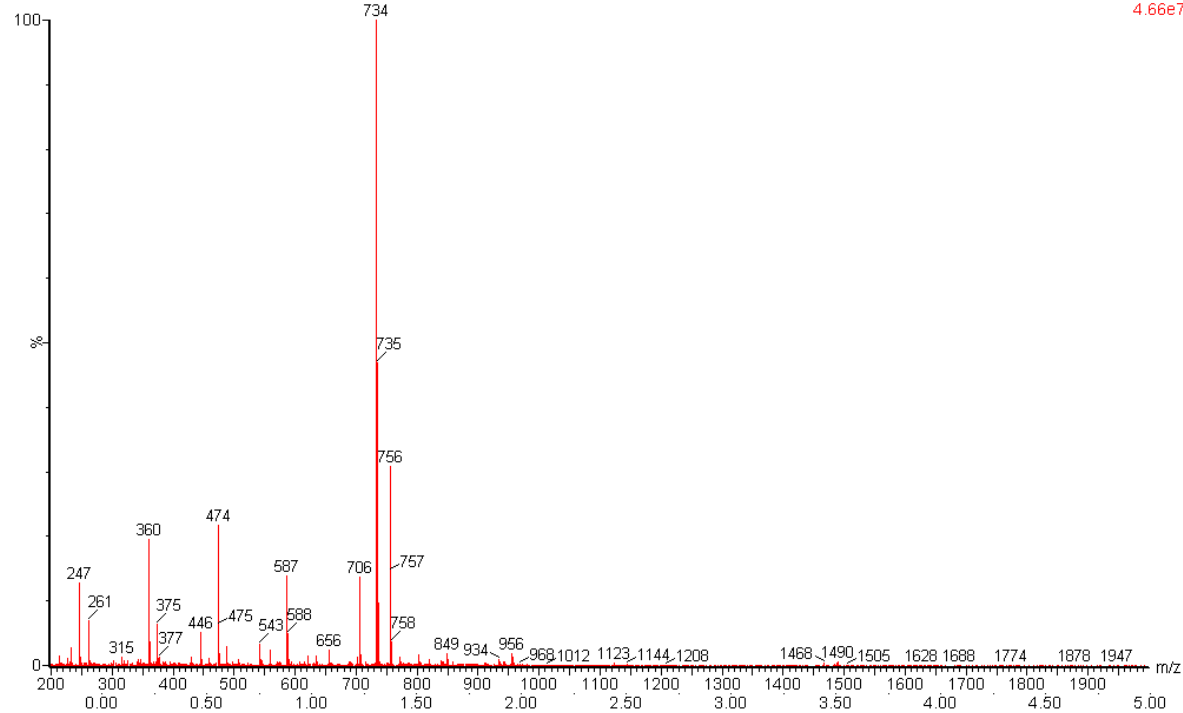

9EpDN ( $^1\text{H}$  NMR, 500 MHz,  $\text{CDCl}_3$ )



2018-12-11-Lokey-9-EPD12N.10.fid

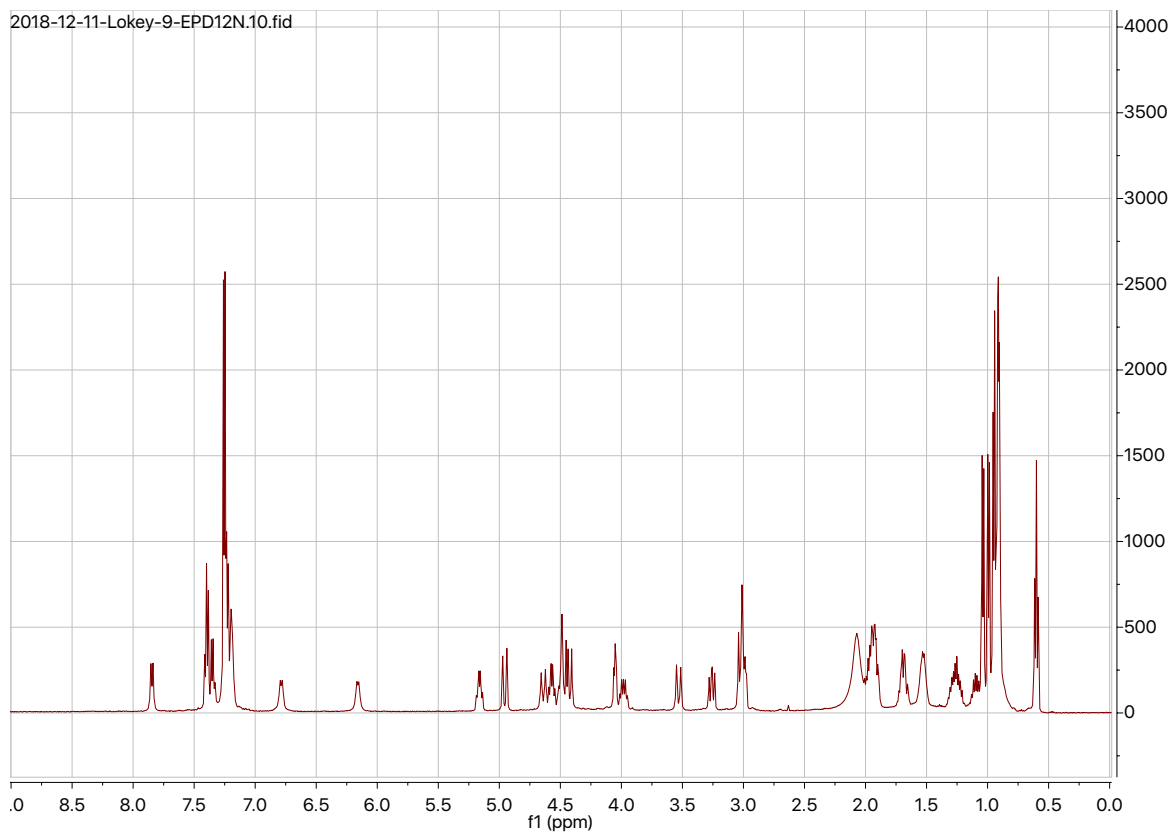

## 1EpDN 6Ala

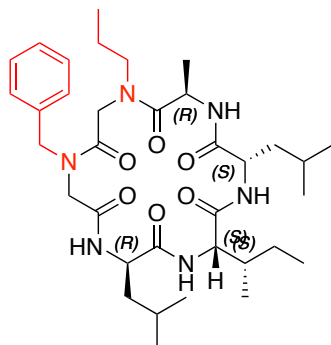

Exact Mass: 656.43  
Molecular Weight: 656.87

SMILE structure:

```
O=C([C@H](CC(C)C)NC([C@@]([C@@H](C)CC)
([H])N1=O)N[C@@H](C(N(CC(N(CC2=CC=CC=
C2)CC(N[C@H](CC(C)C)C1=O)=O)=O)CCC)=O)C
```

## 1EpDN 6Ala (<sup>1</sup>H NMR, 500 MHz, CDCl<sub>3</sub>)

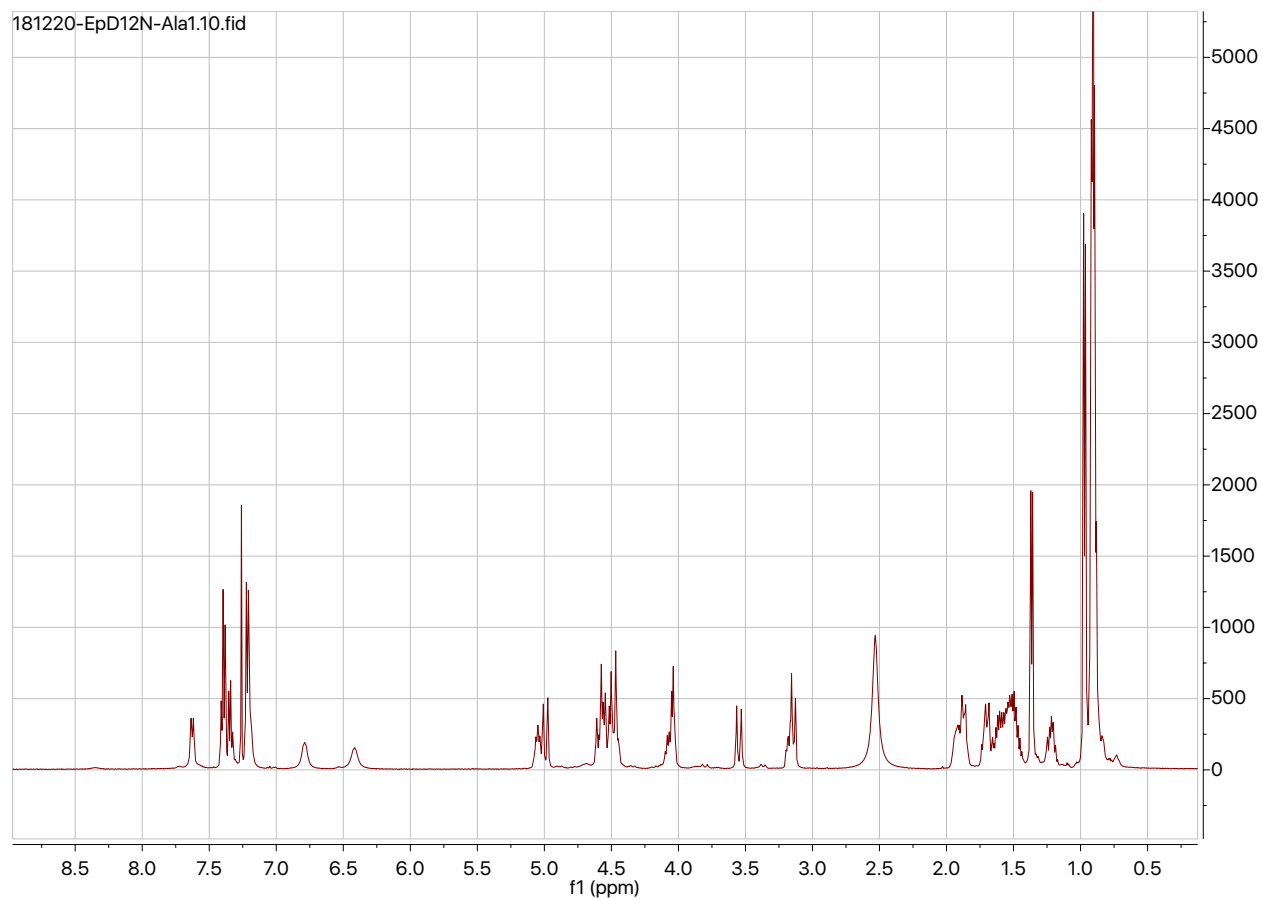

## 1EpDN 5Ala

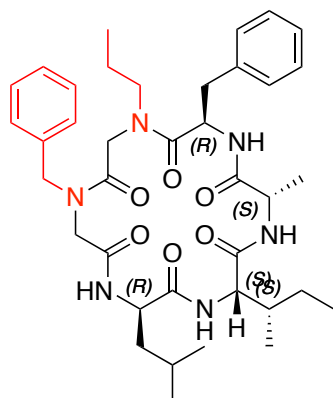

Exact Mass: 690.41  
Molecular Weight: 690.89

SMILE structure:

```
C[C@@H](C(N[C@@H](C(N(CC(N(CC  
1=CC=CC=C1)CC(N[C@H](CC(C)C)C2=  
O)=O)=O)CCC)=O)CC3=CC=CC=C3)=O)  
NC([C@@]([C@@H](C)CC)([H])N2)=O
```

## 1EpDN 5Ala (<sup>1</sup>H NMR, 500 MHz, CDCl<sub>3</sub>)

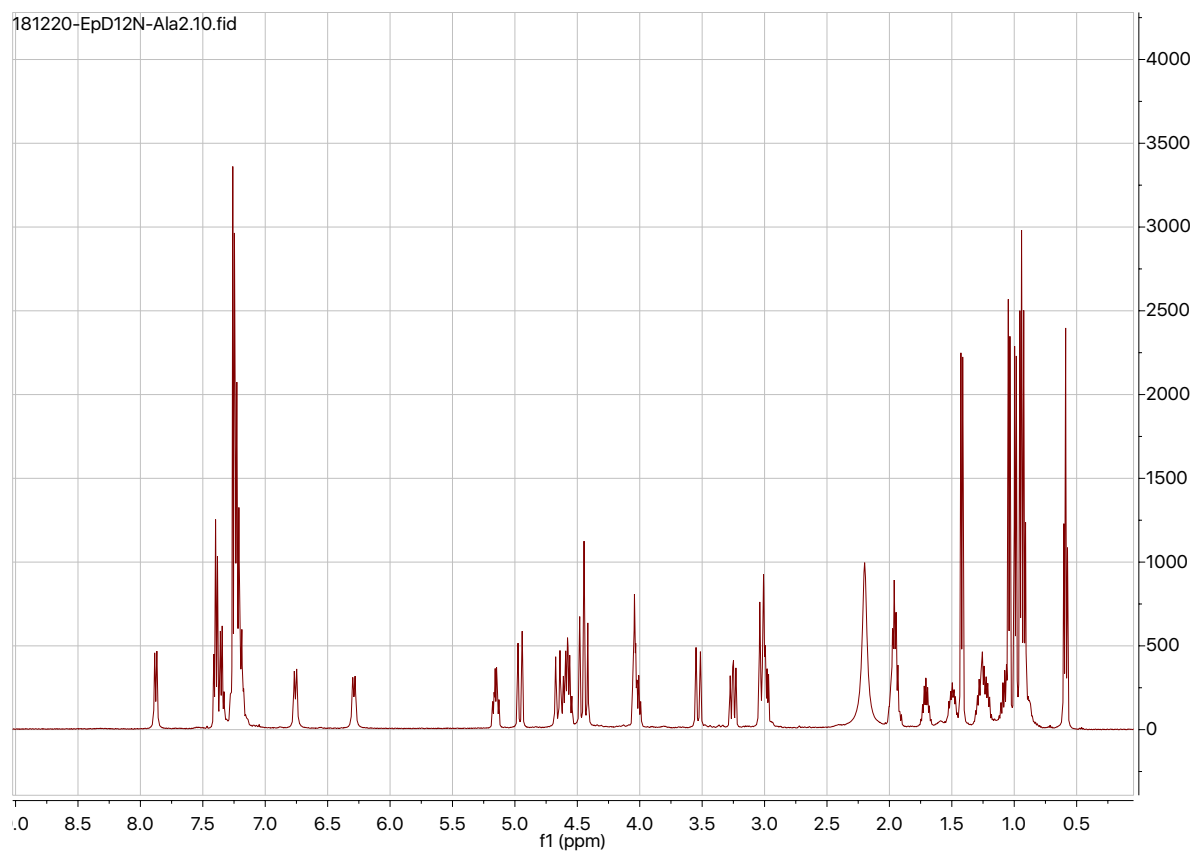

## 1EpDN 4Ala

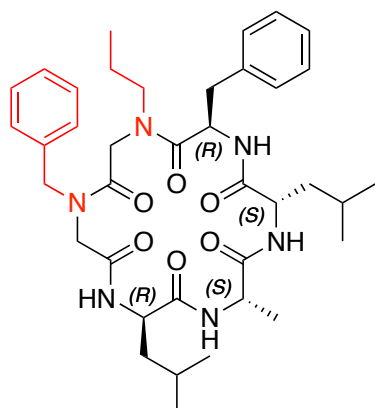

Exact Mass: 690.41  
Molecular Weight: 690.89

SMILE structure:

```
O=C([C@H](CC(C)C)NC([C@H](C)N1=O)N[C@@H](C(N(CC(N(CC2=CC=CC=C2)CC(N[C@H](CC(C)C)C1=O)=O)=O)CCC)=O)CC3=CC=CC=C3
```

## 1EpDN 4Ala (<sup>1</sup>H NMR, 500 MHz, CDCl<sub>3</sub>)

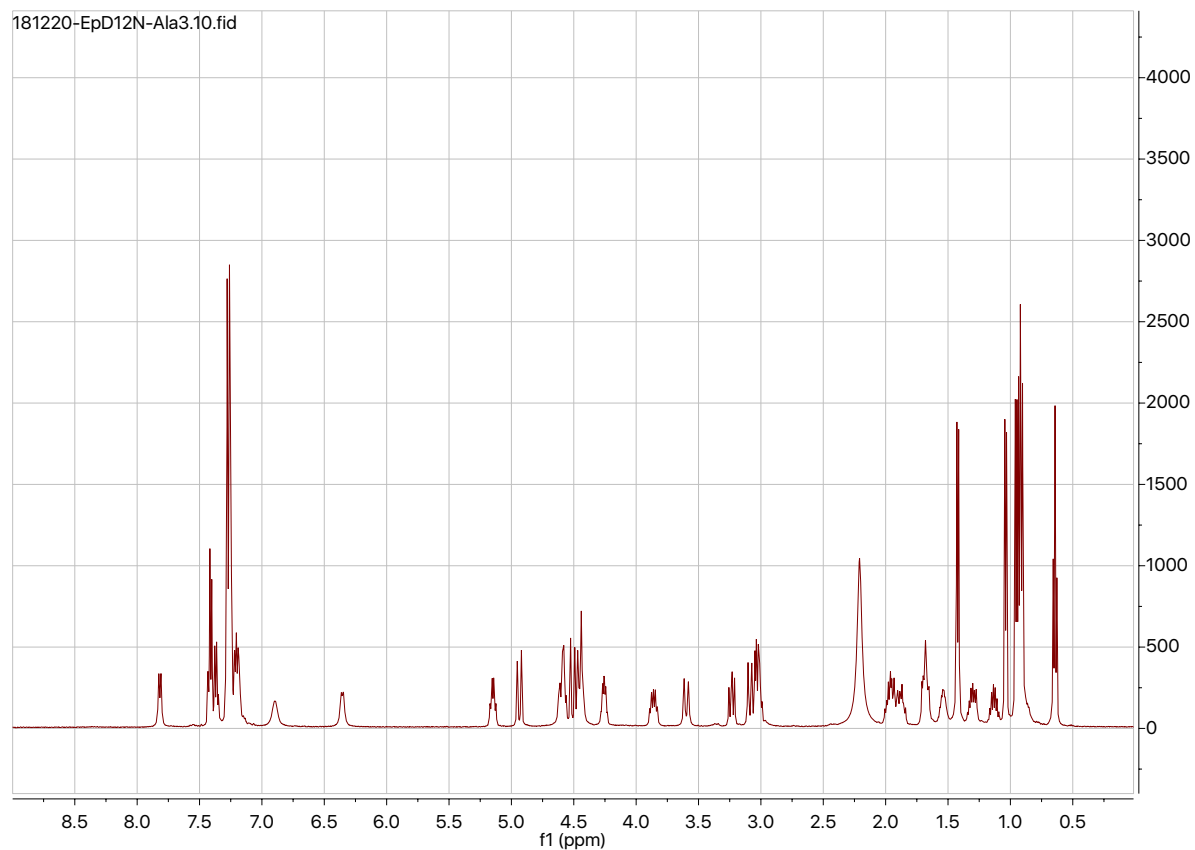

### 1EpDN 3Ala

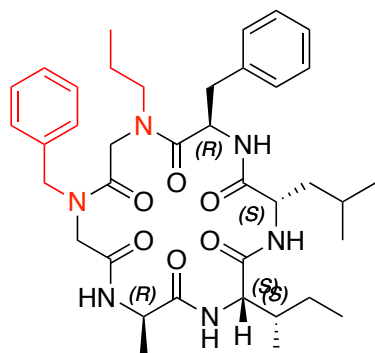

Exact Mass: 690.41  
Molecular Weight: 690.89

SMILE structure:

```
O=C([C@H](CC(C)C)NC([C@@]([C@@H](C)CC)([H])N1)=O)N[C@@H](C(N(CC(N(CC2=CC=CC=C2)CC(N[C@H](C)C1=O)=O)=O)CCC)=O)CC3=CC=CC=C3
```

### 1EpDN 3Ala (<sup>1</sup>H NMR, 500 MHz, CDCl<sub>3</sub>)

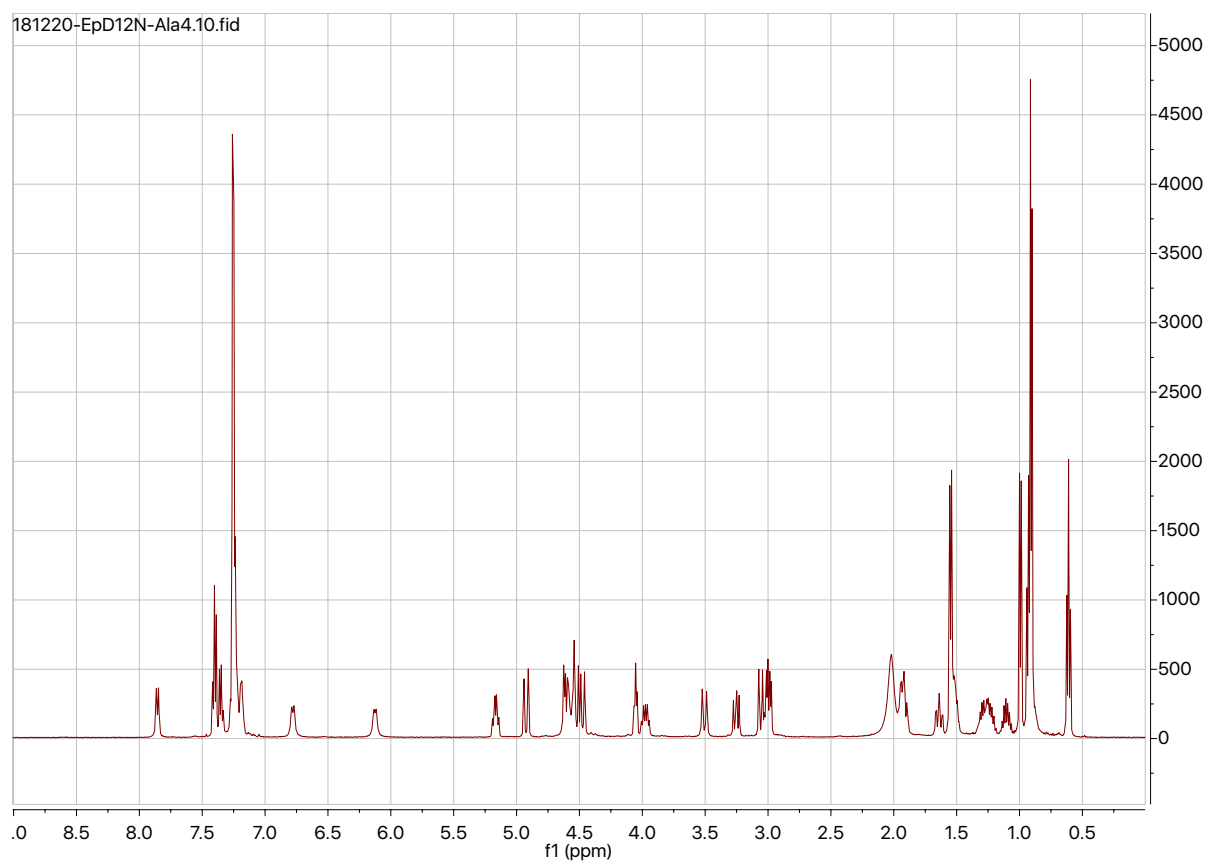

## 1EpDN 1Sar

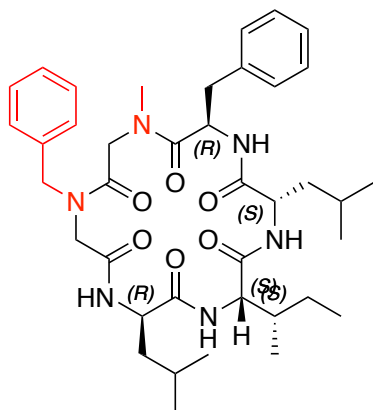

Exact Mass: 704.43  
Molecular Weight: 704.91

SMILE Structure:

```
O=C([C@H](CC(C)C)NC([C@@]([C@@H](C)CC)([H])N1)=O)N[C@@H](C(N(CC(N(CC2=CC=CC=C2)CC(N[C@H](CC(C)C)C1=O)=O)=O)C=O)CC3=CC=CC=C3
```

## 1EpDN 1Sar (<sup>1</sup>H NMR, 500 MHz, CDCl<sub>3</sub>)

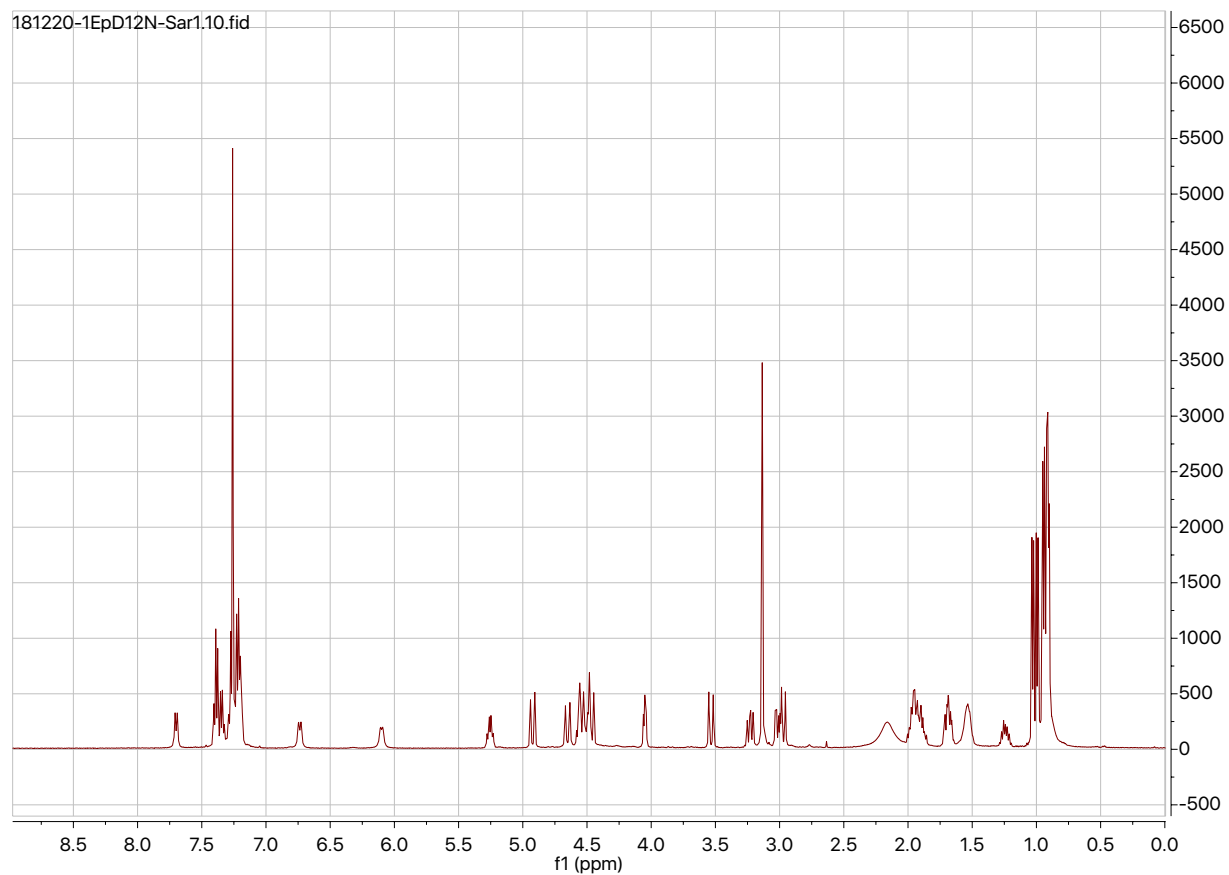

## 1EpDN 2Sar

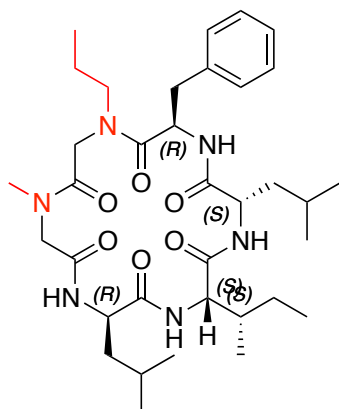

Exact Mass: 656.43  
Molecular Weight: 656.87

SMILE structure:

```
O=C([C@H](CC(C)C)NC([C@@]([C@@H](C)C)C)C([H])N1=O)N[C@@H](C(N(CC(N(C)CC(N[C@H](CC(C)C)C1=O)=O)=O)CCC=O)CC=CC=C)C=C
```

## 1EpDN 2Sar (<sup>1</sup>H NMR, 500 MHz, CDCl<sub>3</sub>)

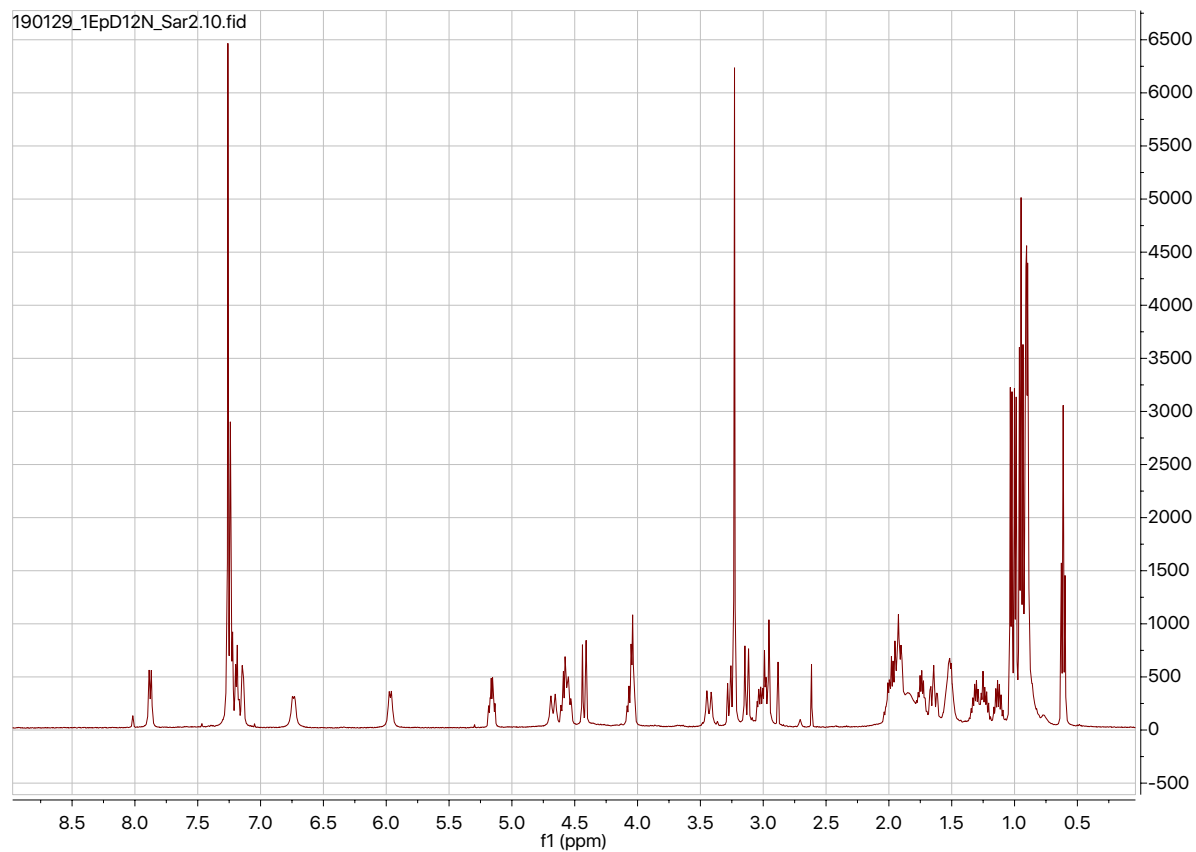

## 4EpDN 1Sar

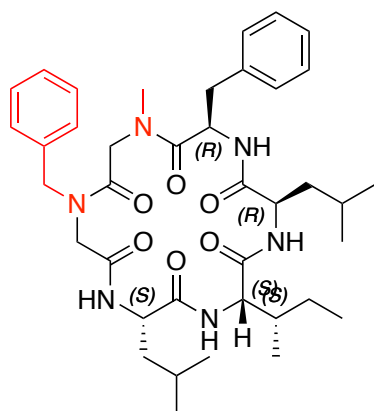

Exact Mass: 704.43  
Molecular Weight: 704.91

SMILE structure:

```
O=C([C@@H](CC(C)C)NC([C@@]([C@@H](C)C)C)([H])N1)=O)N[C@@H](C(N(CC(N(CC2=CC=CC=C2)CC(N[C@@H](CC(C)C)C1=O)=O)=O)C)=O)C3=CC=CC=C3
```

## 4EpDN 1Sar (<sup>1</sup>H NMR, 500 MHz, CDCl<sub>3</sub>)

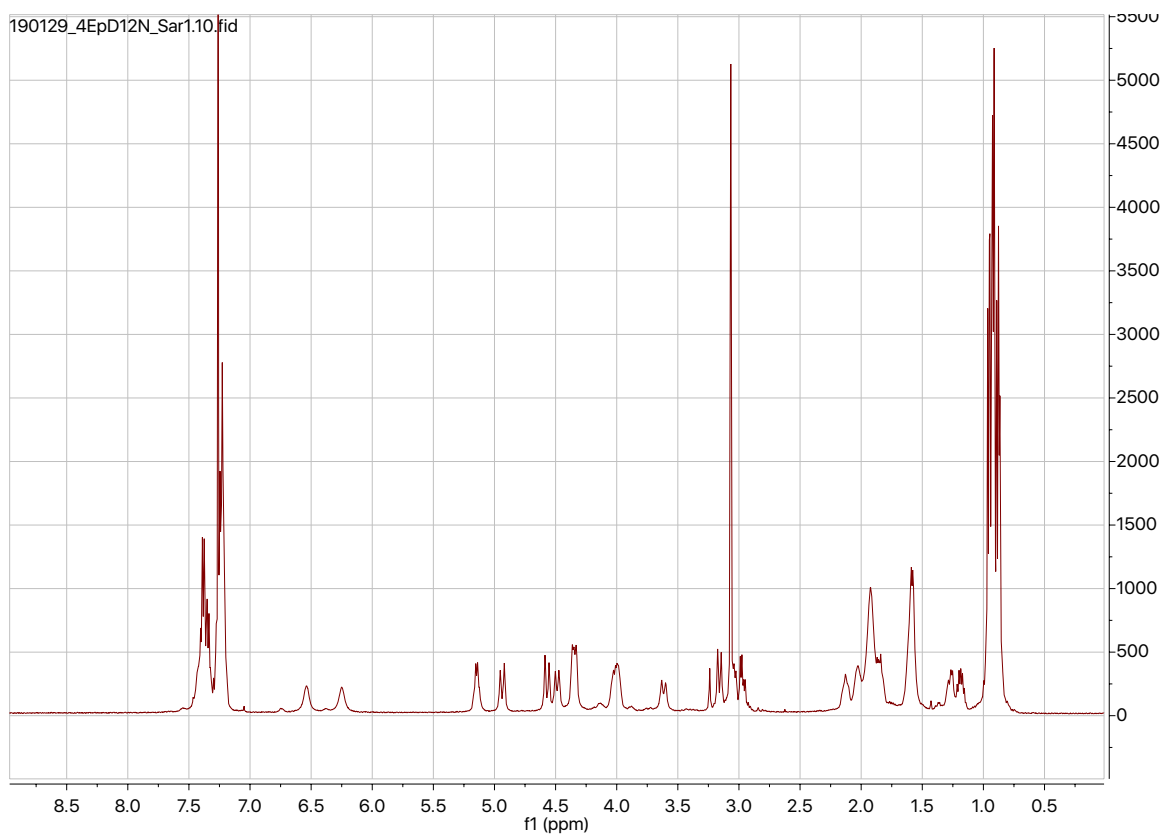



### 4EpDN 2Sar

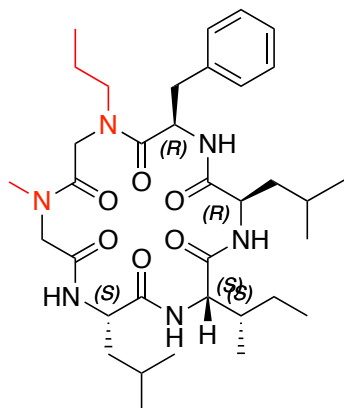

Exact Mass: 656.43  
Molecular Weight: 656.87

SMILE structure:

```
O=C([C@@H](CC(C)C)NC([C@@]([C@@H](C)C)C)([H])N1=O)N[C@@H](C(N(CC(N(C)CC(N[C@@H](CC(C)C)C1=O)=O)=O)CCC)=O)CC2=CC=CC=C2
```

### 4EpDN 2Sar (<sup>1</sup>H NMR, 500 MHz, CDCl<sub>3</sub>)

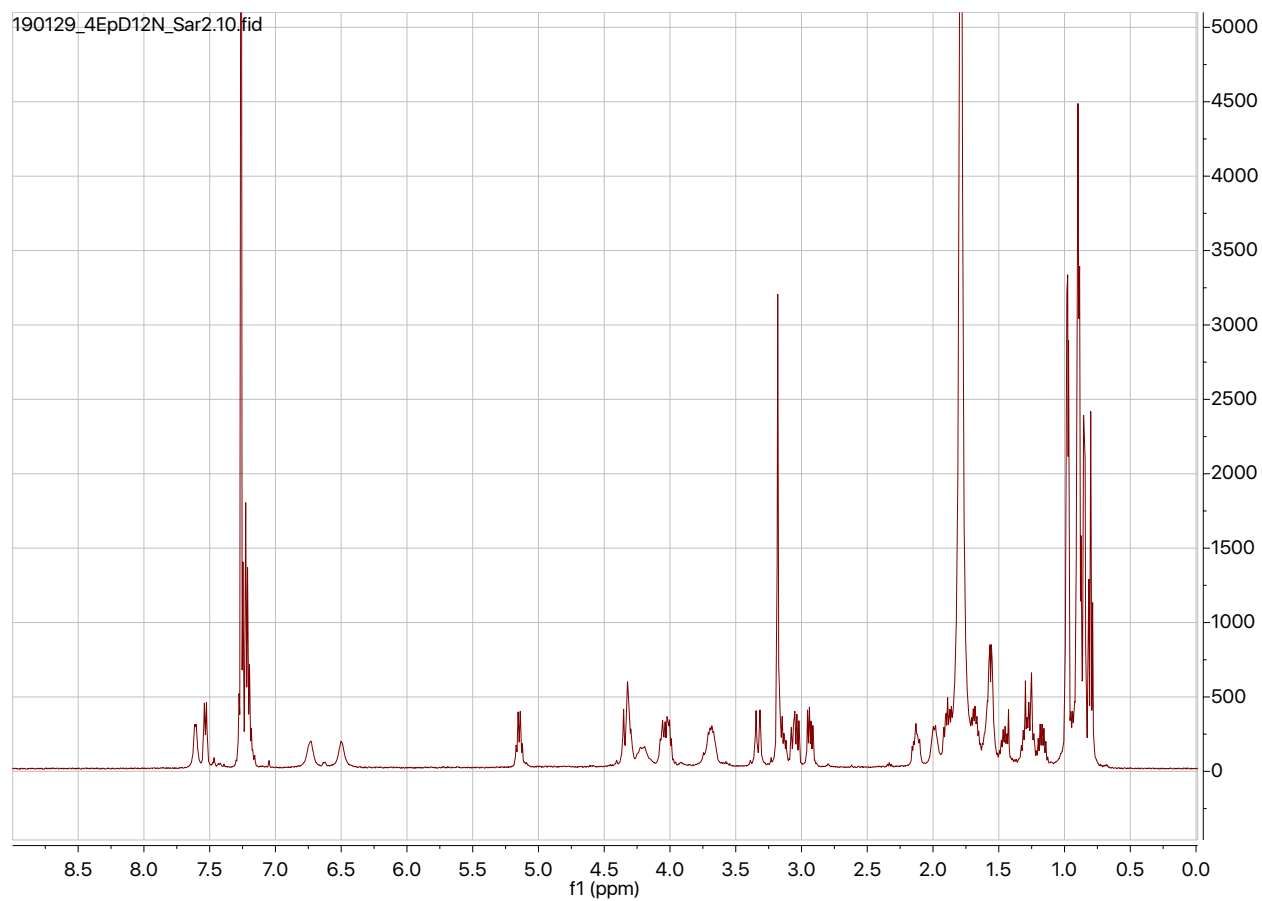

## References

1. Matsui H, Eguchi M, Ohsumi K, Nakamura A, Isshiki Y, Sekiya K, Kikuchi Y, Nagamitsu T, Masuma R, Sunazuka T, Omura S. 2005. Azithromycin inhibits the formation of flagellar filaments without suppressing flagellin synthesis in *Salmonella enterica* serovar typhimurium. *Antimicrob Agents Chemother* 49:3396-403.
2. Aiello D, Williams JD, Majgier-Baranowska H, Patel I, Peet NP, Huang J, Lory S, Bowlin TL, Moir DT. 2010. Discovery and characterization of inhibitors of *Pseudomonas aeruginosa* type III secretion. *Antimicrob Agents Chemother* 54:1988-99.
3. Bowlin NO, Williams JD, Knoten CA, Torhan MC, Tashjian TF, Li B, Aiello D, Mecsas J, Hauser AR, Peet NP, Bowlin TL, Moir DT. 2014. Mutations in the *Pseudomonas aeruginosa* needle protein gene *pscF* confer resistance to phenoxycetamide inhibitors of the type III secretion system. *Antimicrob Agents Chemother* 58:2211-20.
